# Supplementary material for: Lauroyl Arginate Ethyl Blocks the Iron Signals Necessary for Pseudomonas aeruginosa Biofilm Development
Source: Front Microbiol. 2017 May 30;8:970. doi: 10.3389/fmicb.2017.00970 (PMC5447684; doi:10.3389/fmicb.2017.00970)
Supplement: Supplementary file 3 [file Table_2.XLSX]

## Sheet: Sheet1
TABLE S2. Fold changes in expression for 4,922 genes in response to 50 M LAE treatment.
ID	Gene name	Gene product	Fold change
PA14_00010	dnaA	chromosomal replication initiation protein	1.62525
PA14_00020	dnaN	DNA polymerase III subunit beta	1.25283
PA14_00030	recF	recombination protein F	-1.38663
PA14_00050	gyrB	DNA gyrase subunit B	1.667
PA14_00060		acyltransferase	-1.54165
PA14_00070		D,D-heptose 1,7-bisphosphate phosphatase	-2.36703
PA14_00080		hypothetical protein	2.60631
PA14_00090	glyS	glycyl-tRNA synthetase subunit beta	-1.13405
PA14_00100	glyQ	glycyl-tRNA synthetase subunit alpha	-1.60825
PA14_00110	tag	DNA-3-methyladenine glycosidase I	-1.08864
PA14_00120		lipid A biosynthesis lauroyl acyltransferase	-2.24559
PA14_00130		hypothetical protein	-1.93676
PA14_00140		hypothetical protein	-1.65789
PA14_00150		hypothetical protein	-1.21741
PA14_00160		hypothetical protein	1.21189
PA14_00170	trkA	potassium transporter peripheral membrane protein	-1.04172
PA14_00180		tRNA and rRNA cytosine-C5-methylases	-1.44432
PA14_00190	fmt	methionyl-tRNA formyltransferase	-1.02157
PA14_00200	def	peptide deformylase	-1.31281
PA14_00210		lysin domain-containing protein	-1.23985
PA14_00240		hypothetical protein	-1.76403
PA14_00250	qor	quinone oxidoreductase	1.74319
PA14_00280	hemF	coproporphyrinogen III oxidase	-2.02627
PA14_00290	aroE	shikimate 5-dehydrogenase	-5.00433
PA14_00300	plcB	phospholipase C, PlcB	1.79564
PA14_00310		peptidyl-prolyl isomerase	1.10062
PA14_00320		hypothetical protein	1.6094
PA14_00340		sulfate transporter	-1.16092
PA14_00380	betC	choline sulfatase	1.36472
PA14_00400		LysR family transcriptional regulator	-1.36698
PA14_00410		dioxygenase	-1.32093
PA14_00420		histidine phosphotransfer domain-containing protein	-1.31842
PA14_00430		two-component response regulator	-1.121
PA14_00440	trpA	tryptophan synthase subunit alpha	-1.0108
PA14_00450	trpB	tryptophan synthase subunit beta	-1.22346
PA14_00460	trpI	transcriptional regulator TrpI	-1.53124
PA14_00470		hypothetical protein	-1.23554
PA14_00480		hypothetical protein	1.09944
PA14_00490		hemolysin activation/secretion protein	1.13024
PA14_00510		hemagglutinin	-1.37212
PA14_00530		hypothetical protein	-1.57546
PA14_00550		hypothetical protein	1.49071
PA14_00560	exoT	exoenzyme T	3.16505
PA14_00570		lipoprotein	1.08675
PA14_00580		lipoprotein	-1.26255
PA14_00600		transcriptional regulator	1.03021
PA14_00630		hypothetical protein	-1.14383
PA14_00640	phzH	potential phenazine-modifying enzyme	-1.01757
PA14_00650		hypothetical protein	1.5697
PA14_00660		RNA 2'-phosphotransferase-like protein	-1.35203
PA14_00670		hypothetical protein	1.02237
PA14_00680		LysR family transcriptional regulator	-1.81207
PA14_00710	osmC	osmotically inducible protein OsmC	-1.33064
PA14_00720		hypothetical protein	-1.23631
PA14_00730		hypothetical protein	-1.15006
PA14_00740		lipoprotein	1.29748
PA14_00750		hypothetical protein	-1.72443
PA14_00760		hypothetical protein	1.12892
PA14_00770		hypothetical protein	1.51677
PA14_00780		hypothetical protein	1.49769
PA14_00790	prlC	oligopeptidase A	1.60533
PA14_00800		hypothetical protein	-1.09415
PA14_00820		hypothetical protein	4.44393
PA14_00830		hypothetical protein	-3.69309
PA14_00850		hypothetical protein	-1.06665
PA14_00860		ABC transporter ATP-binding protein	1.4653
PA14_00890		phosphoprotein phosphatase	1.28773
PA14_00900		hypothetical protein	1.37962
PA14_00910		hypothetical protein	1.40216
PA14_00925		hypothetical protein	1.44124
PA14_00960		lipoprotein	1.53887
PA14_01010		hypothetical protein	1.20621
PA14_01020		hypothetical protein	1.73144
PA14_01030		hypothetical protein	1.24755
PA14_01040		secretion protein	1.61241
PA14_01060		hypothetical protein	1.22439
PA14_01080		hypothetical protein	1.0441
PA14_01100		ClpA/B-type chaperone	2.1306
PA14_01110		hypothetical protein	1.6133
PA14_01120		hypothetical protein	1.18625
PA14_01130		hypothetical protein	-1.22556
PA14_01140		hypothetical protein	1.34879
PA14_01150		hypothetical protein	-2.7122
PA14_01160		hypothetical protein	1.43119
PA14_01170		hypothetical protein	2.32898
PA14_01190		3-oxoacyl-ACP synthase	1.32153
PA14_01200		hypothetical protein	-1.04997
PA14_01220		hypothetical protein	1.30394
PA14_01230		hypothetical protein	1.10531
PA14_01240		carbonic anhydrase	-1.30639
PA14_01250		sulfate transporter	-1.04885
PA14_01290	coxB	cytochrome c oxidase subunit II	1.6379
PA14_01300	coxA	cytochrome c oxidase subunit I	1.50923
PA14_01320	coIII	cytochrome c oxidase subunit III	1.40079
PA14_01330		hypothetical protein	1.18818
PA14_01340		hypothetical protein	1.20969
PA14_01350		hypothetical protein	1.5383
PA14_01360		hypothetical protein	1.5343
PA14_01380		protoheme IX farnesyltransferase	1.03778
PA14_01390		hypothetical protein	-1.48982
PA14_01400		hypothetical protein	-2.81485
PA14_01410		hypothetical protein	1.159
PA14_01430		short chain dehydrogenase	-1.10317
PA14_01440		hypothetical protein	-1.16277
PA14_01460		C4-dicarboxylate transporter DctA	-1.17243
PA14_01470		transcriptional regulator	1.36199
PA14_01490		hemolysin	1.30694
PA14_01500		transcriptional regulator	1.35969
PA14_01510		hypothetical protein	1.36757
PA14_01520		hypothetical protein	1.37656
PA14_01550		lipoprotein	-1.61695
PA14_01560		hypothetical protein	-2.80956
PA14_01580	gabP	gamma-aminobutyrate permease	1.04461
PA14_01600		aldehyde dehydrogenase	1.05666
PA14_01610		hypothetical protein	-1.69792
PA14_01620	aptA	beta alanine--pyruvate transaminase	1.75826
PA14_01640		LysR family transcriptional regulator	1.26721
PA14_01660		guanine deaminase	1.6271
PA14_01690		ABC transporter permease	1.04218
PA14_01710	ahpC	alkyl hydroperoxide reductase	-4.24077
PA14_01720	ahpF	alkyl hydroperoxide reductase	1.37808
PA14_01730		hypothetical protein	2.4047
PA14_01760	nuh	nonspecific ribonucleoside hydrolase	-1.01375
PA14_01770		nucleoside-binding outer membrane protein	-1.34648
PA14_01790		nucleoside 2-deoxyribosyltransferase	-1.23017
PA14_01810		oxidoreductase	-1.21485
PA14_01830		adenosine deaminase	-1.01363
PA14_01840		RNA polymerase ECF-subfamily sigma-70 factor	1.56408
PA14_01860		transmembrane sensor	1.59085
PA14_01870		TonB-dependent receptor	1.66135
PA14_01890	pcaQ	transcriptional regulator PcaQ	-1.51589
PA14_01900	pcaH	protocatechuate 3,4-dioxygenase subunit beta	-1.05486
PA14_01910	pcaG	protocatechuate 3,4-dioxygenase subunit alpha	-1.091
PA14_01930	pcaR	transcriptional regulator PcaR	1.39353
PA14_01940		RND efflux membrane fusion protein	1.36164
PA14_01960		RND efflux membrane fusion protein	1.30293
PA14_01970		RND efflux transporter	-1.05075
PA14_01980		LysR family transcriptional regulator	1.10805
PA14_01990		hypothetical protein	1.0632
PA14_02010		hypothetical protein	1.60981
PA14_02020		outer membrane porin	1.10212
PA14_02030		AraC family transcriptional regulator	-1.72207
PA14_02050		gamma-glutamyltranspeptidase	-1.42977
PA14_02060		hypothetical protein	-2.17664
PA14_02090		TetR family transcriptional regulator	-3.09015
PA14_02100		hypothetical protein	-1.39449
PA14_02180	cheB	chemotaxis-specific methylesterase	1.4612
PA14_02190		hypothetical protein	1.33838
PA14_02220		chemotaxis transducer	4.201
PA14_02230	cheW	purine-binding chemotaxis protein	3.15588
PA14_02260		two-component response regulator	3.10451
PA14_02270		chemotaxis transducer	1.80259
PA14_02290		LysR family transcriptional regulator	-1.10611
PA14_02300	fabG	3-ketoacyl-ACP reductase	-1.42257
PA14_02340		ABC transporter permease	-1.08753
PA14_02360		ABC transporter substrate-binding protein	-1.24946
PA14_02380		acid phosphatase	1.06788
PA14_02390		transcriptional regulator	1.27924
PA14_02435		hypothetical protein	1.08012
PA14_02450		NAD(P) transhydrogenase subunit alpha part 1	1.00792
PA14_02460		NAD(P) transhydrogenase subunit alpha part 2	-1.14432
PA14_02470	pntB	pyridine nucleotide transhydrogenase subunit beta	-1.66994
PA14_02490	tonB2	hypothetical protein	1.60445
PA14_02500	exbB1	transport protein ExbB	1.27216
PA14_02510	exbD1	transport protein ExbD	1.18899
PA14_02520		hypothetical protein	1.04762
PA14_02530		hypothetical protein	-3.13177
PA14_02570	mdcC	malonate decarboxylase subunit delta	2.60271
PA14_02590	mdcE	malonate decarboxylase subunit gamma	1.40626
PA14_02610		phosphoribosyl-dephospho-CoA transferase	1.25462
PA14_02630		malonate carrier protein	-1.101
PA14_02640		malonate transporter subunit MadM	-1.02447
PA14_02650		malonate utilization transcriptional regulator	-1.15552
PA14_02690		amino acid permease	1.26539
PA14_02730		dihydrodipicolinate synthetase	1.98459
PA14_02740		class II aldolase/adducin domain-containing protein	-1.68555
PA14_02750		transcriptional regulator	-1.08104
PA14_02760		CoA transferase, subunit A	1.1585
PA14_02790	pcaF	beta-ketoadipyl CoA thiolase	-1.01414
PA14_02810	pcaT	dicarboxylic acid transporter PcaT	1.21976
PA14_02830	pcaB	3-carboxy-cis,cis-muconate cycloisomerase	1.38928
PA14_02840	pcaD	beta-ketoadipate enol-lactone hydrolase	-1.01256
PA14_02850	pcaC	gamma-carboxymuconolactone decarboxylase	1.17128
PA14_02870		transcriptional regulator	-1.06643
PA14_02900	pcaK	4-hydroxybenzoate transporter PcaK	1.24285
PA14_02910		IclR family transcriptional regulator	-1.20043
PA14_02930		oxidoreductase	-1.41822
PA14_02970		hypothetical protein	-1.02269
PA14_02990		MFS transporter	1.17787
PA14_03010		TetR family transcriptional regulator	-2.91738
PA14_03030	aroQ2	3-dehydroquinate dehydratase	-1.23774
PA14_03040		MFS transporter	-1.27097
PA14_03070		transcriptional regulator	1.00835
PA14_03080		acetyltransferase	-1.56086
PA14_03090		hypothetical protein	-1.55705
PA14_03110		hypothetical protein	-3.42906
PA14_03120		transcriptional regulator	-1.35035
PA14_03130		hypothetical protein	1.25
PA14_03150		hypothetical protein	1.0919
PA14_03160		hypothetical protein	1.04072
PA14_03163		hypothetical protein	-1.06017
PA14_03166		hypothetical protein	-1.29224
PA14_03170		hypothetical protein	-1.56643
PA14_03180		hypothetical protein	-1.41147
PA14_03200		hypothetical protein	-1.30898
PA14_03210		hypothetical protein	1.28105
PA14_03240	hcpC	secreted protein Hcp	-1.09202
PA14_03250		hypothetical protein	-1.09473
PA14_03265		hypothetical protein	-1.43004
PA14_03270		hypothetical protein	-1.22172
PA14_03285		hypothetical protein	-1.47521
PA14_03290		hypothetical protein	-2.10197
PA14_03300		hypothetical protein	-1.63143
PA14_03320		hypothetical protein	-1.27288
PA14_03330		hypothetical protein	-1.66115
PA14_03340		hypothetical protein	-1.33717
PA14_03350		hypothetical protein	-1.16928
PA14_03360		hypothetical protein	-1.35022
PA14_03370		hypothetical protein	1.22421
PA14_03380		hypothetical protein	-1.38904
PA14_03390		hypothetical protein	-1.37256
PA14_03410		tRNA-Arg	7.66107
PA14_03420		hypothetical protein	1.85659
PA14_03430	gabD	succinate-semialdehyde dehydrogenase I	1.5155
PA14_03450	gabT	4-aminobutyrate aminotransferase	1.64894
PA14_03470		hypothetical protein	-1.42062
PA14_03480		GntR family transcriptional regulator	-1.04124
PA14_03490		hypothetical protein	1.47698
PA14_03510		hypothetical protein	-1.11352
PA14_03520		hypothetical protein	-1.21688
PA14_03560		hypothetical protein	1.54238
PA14_03580		transcriptional regulator	1.21576
PA14_03590		hypothetical protein	1.75002
PA14_03610		Zn-dependent protease with chaperone function	2.39326
PA14_03620		hypothetical protein	1.28144
PA14_03630		ArsR family transcriptional regulator	1.05942
PA14_03650	cysA	sulfate transport protein CysA	1.20673
PA14_03670	cysW	sulfate transport protein CysW	1.68334
PA14_03680	cysT	sulfate transport protein CysT	1.28392
PA14_03700	sbp	sulfate-binding protein	1.84084
PA14_03710		hypothetical protein	-1.06059
PA14_03720		sensory box GGDEF domain-containing protein	-1.80974
PA14_03730		fatty acid desaturase	-2.54884
PA14_03780		transcriptional regulator	1.34381
PA14_03790		sensory box GGDEF domain-containing protein	-1.4729
PA14_03800	oprE	anaerobically-induced outer membrane porin OprE precursor	1.71963
PA14_03810	aguA	agmatine deiminase	1.08762
PA14_03830	aguB	N-carbamoylputrescine amidohydrolase	-1.11061
PA14_03840	aguR	transcriptional regulator AguR	-1.5087
PA14_03855		periplasmic polyamine binding protein	1.17675
PA14_03860		glutamine synthetase	-1.30005
PA14_03870	spuA	glutamine amidotransferase	-2.37912
PA14_03880	spuB	glutamine synthetase	1.33164
PA14_03900	spuC	aminotransferase	2.03887
PA14_03920	spuD	polyamine transport protein	-1.01379
PA14_03930	spuE	polyamine transport protein	-1.40384
PA14_03940	spuF	polyamine transport protein PotG	-1.17877
PA14_03950	spuG	polyamine transport protein PotH	-1.19767
PA14_03960	spuH	polyamine transport protein PotI	-1.67103
PA14_03980		hypothetical protein	1.5746
PA14_04000		transcriptional regulator	1.13068
PA14_04010		hypothetical protein	1.03446
PA14_04030		hypothetical protein	-2.65696
PA14_04040		hypothetical protein	1.08903
PA14_04050		proline hydroxylase	-1.30919
PA14_04070		hypothetical protein	1.119
PA14_04080		ABC transporter permease	-1.32145
PA14_04090		ABC transporter substrate-binding protein	1.58652
PA14_04100		hypothetical protein	-2.38332
PA14_04110	serA	D-3-phosphoglycerate dehydrogenase	1.02058
PA14_04140		hypothetical protein	1.10486
PA14_04150		hypothetical protein	-1.00184
PA14_04160		transcriptional regulator	-1.53259
PA14_04180		hypothetical protein	-4.08153
PA14_04190		acetylpolyamine aminohydrolase	1.03982
PA14_04210		transporter	1.29893
PA14_04220		ABC transporter substrate-binding protein	1.34626
PA14_04230		ABC transporter permease	1.18156
PA14_04240		ABC transporter permease	-1.21876
PA14_04250		ABC transporter ATP-binding protein	-1.16128
PA14_04270		transcriptional regulator	-1.11341
PA14_04290		hypothetical protein	1.36722
PA14_04300		hypothetical protein	-1.30083
PA14_04310	rpiA	ribose-5-phosphate isomerase A	-1.47159
PA14_04320	ilvA1	threonine dehydratase	-1.20235
PA14_04330		hypothetical protein	-1.2516
PA14_04340		hypothetical protein	2.42277
PA14_04350		integral membrane protein	1.16493
PA14_04370		MFS transporter	-1.52311
PA14_04380		hypothetical protein	-1.95176
PA14_04390	ygdP	dinucleoside polyphosphate hydrolase	-2.46375
PA14_04410	ptsP	phosphoenolpyruvate-protein phosphotransferase PtsP	1.52922
PA14_04420		hypothetical protein	1.04389
PA14_04430		hypothetical protein	-1.71251
PA14_04440		permease	-2.04827
PA14_04460	lgt	prolipoprotein diacylglyceryl transferase	-1.72161
PA14_04480	thyA	thymidylate synthase	-1.55249
PA14_04490		hypothetical protein	-1.62296
PA14_04510		hypothetical protein	1.29124
PA14_04520		hypothetical protein	-1.06262
PA14_04530		hypothetical protein	1.63896
PA14_04560		hypothetical protein	-1.36771
PA14_04580	folA	dihydrofolate reductase	-2.65528
PA14_04590		hypothetical protein	-1.38519
PA14_04610		transporter	-1.49322
PA14_04630	ilvD	dihydroxy-acid dehydratase	-1.03869
PA14_04640		hypothetical protein	-1.90103
PA14_04650	pfpI	protease PfpI	-1.24867
PA14_04660		hypothetical protein	-2.15331
PA14_04670	mutM	formamidopyrimidine-DNA glycosylase	-1.94746
PA14_04680		hypothetical protein	-1.3632
PA14_04690		hypothetical protein	-1.73182
PA14_04700		hypothetical protein	-1.24753
PA14_04710		hypothetical protein	-1.50787
PA14_04730		gamma-glutamyltranspeptidase	1.27604
PA14_04750	fdx1	ferredoxin (4Fe-4S)	-2.44657
PA14_04760	coaD	phosphopantetheine adenylyltransferase	-1.99158
PA14_04790		hypothetical protein	1.84634
PA14_04810		aldehyde dehydrogenase	2.0128
PA14_04820		TetR family transcriptional regulator	-1.71158
PA14_04830		acetyltransferase	1.22626
PA14_04840		hypothetical protein	-1.19446
PA14_04860		methyltransferase	-1.19413
PA14_04870		hypothetical protein	-1.00625
PA14_04890		zinc protease	1.67473
PA14_04900	ftsY	signal recognition particle receptor FtsY	1.31337
PA14_04910	ftsE	cell division ATP-binding protein FtsE	-1.87769
PA14_04920	ftsX	cell division protein FtsX	-1.62749
PA14_04930	rpoH	RNA polymerase factor sigma-32	2.64146
PA14_04940		hypothetical protein	-1.62081
PA14_04950	mtgA	monofunctional biosynthetic peptidoglycan transglycosylase	-1.29669
PA14_04960		hypothetical protein	-1.94968
PA14_04970		sulfur carrier protein ThiS	-3.63983
PA14_04980	thiG	thiazole synthase	-1.16713
PA14_05000	trmB	tRNA (guanine-N(7)-)-methyltransferase	-3.18775
PA14_05020		hypothetical protein	-1.77606
PA14_05030		hypothetical protein	-1.21525
PA14_05040		coproporphyrinogen III oxidase	-1.75492
PA14_05050		deoxyribonucleotide triphosphate pyrophosphatase	-1.04192
PA14_05060		hypothetical protein	1.15801
PA14_05070		methionine biosynthesis protein	-2.0934
PA14_05080	metX	homoserine O-acetyltransferase	-1.50469
PA14_05110		hypothetical protein	2.55718
PA14_05130		hypothetical protein	-1.1758
PA14_05150	proC	pyrroline-5-carboxylate reductase	1.27215
PA14_05160		hypothetical protein	-2.16659
PA14_05180	pilT	twitching motility protein PilT	1.18467
PA14_05190	pilU	twitching motility protein PilU	-1.31202
PA14_05200		cation efflux system protein	-1.0965
PA14_05210		hypothetical protein	-2.41723
PA14_05220		cystathionine beta-synthase	3.72935
PA14_05230		cystathionine gamma-lyase	2.46616
PA14_05250	pyrC	dihydroorotase	1.50732
PA14_05260	pyrB	aspartate carbamoyltransferase	-1.12302
PA14_05270	pyrR	bifunctional pyrimidine regulatory protein PyrR/uracil phosphoribosyltransferase	1.47462
PA14_05280	yqgF	Holliday junction resolvase-like protein	-1.29465
PA14_05290		hypothetical protein	2.14077
PA14_05300		TonB domain-containing protein	-1.35856
PA14_05310	gshB	glutathione synthetase	1.12951
PA14_05320	pilG	twitching motility protein PilG	-2.52478
PA14_05330	pilH	twitching motility protein PilH	-1.91075
PA14_05340	pilI	twitching motility protein PilI	-2.57089
PA14_05360	pilJ	twitching motility protein PilJ	1.09376
PA14_05380	pilK	methyltransferase PilK	-1.11316
PA14_05390	chpA	ChpA	1.1027
PA14_05400		methylesterase	1.08239
PA14_05410		chemotaxis protein	2.23429
PA14_05420		transcriptional regulator	-1.09654
PA14_05430		chemotaxis protein	1.19945
PA14_05440		hypothetical protein	1.07445
PA14_05450		16S ribosomal RNA methyltransferase RsmE	-1.30707
PA14_05460	bioA	adenosylmethionine-8-amino-7-oxononanoate aminotransferase	1.16915
PA14_05480		hypothetical protein	1.13242
PA14_05500		hypothetical protein	-2.72728
PA14_05510		hypothetical protein	-1.42149
PA14_05520	mexR	multidrug resistance operon repressor MexR	1.25687
PA14_05530	mexA	RND multidrug efflux membrane fusion protein MexA	1.05524
PA14_05540	mexB	RND multidrug efflux transporter MexB	1.25487
PA14_05550	oprM	major intrinsic multiple antibiotic resistance efflux outer membrane protein OprM precursor	1.12289
PA14_05560		ATP-dependent RNA helicase	-1.025
PA14_05580		hypothetical protein	-1.27982
PA14_05590	metF	5,10-methylenetetrahydrofolate reductase	1.36413
PA14_05600		hypothetical protein	1.1188
PA14_05620	sahH	S-adenosyl-L-homocysteine hydrolase	1.75349
PA14_05630		hypothetical protein	2.63103
PA14_05640		hypothetical protein	2.87784
PA14_05650		hypothetical protein	2.07834
PA14_05660		transcriptional regulator	-1.9059
PA14_05690	codA	cytosine deaminase	-1.08216
PA14_05700	codB	cytosine permease	1.34599
PA14_05770	dhT	phenylhydantoinase	-1.14861
PA14_05790		transporter	2.03629
PA14_05810	amaB	allantoate amidohydrolase	1.09935
PA14_05820		hypothetical protein	-1.01518
PA14_05840	gcdH	glutaryl-CoA dehydrogenase	1.79981
PA14_05850		LysR family transcriptional regulator	1.09043
PA14_05860		hypothetical protein	-1.38486
PA14_05880		membrane-bound protease	4.399
PA14_05890		stomatin-like protein	1.66908
PA14_05910		periplasmic transport system	-1.1176
PA14_05920		hypothetical protein	-1.07516
PA14_05950	dbpA	ATP-dependent RNA helicase DbpA	-1.11497
PA14_05960		cold-shock protein	-8.11387
PA14_05970		hypothetical protein	-2.16416
PA14_05990		EmrB/QacA family drug resistance transporter	1.0658
PA14_06000		ClpA/B protease ATP binding subunit	7.88933
PA14_06010		hypothetical protein	2.02867
PA14_06030		acyltransferase	-1.40991
PA14_06060	creB	DNA-binding response regulator CreB	1.36704
PA14_06070	creC	sensory histidine kinase CreC	-1.53059
PA14_06080	creD	hypothetical protein	-1.62516
PA14_06120		hypothetical protein	1.62023
PA14_06130		hypothetical protein	1.17878
PA14_06150		hypothetical protein	-1.10139
PA14_06160		hydroxamate-type ferrisiderophore receptor	1.65158
PA14_06170		transmembrane sensor	3.73042
PA14_06180		RNA polymerase sigma factor	2.88821
PA14_06190		glutathione S-transferase	-1.23154
PA14_06200		hypothetical protein	1.07594
PA14_06210		transcriptional regulator	2.34431
PA14_06230		permease	-1.13421
PA14_06240		LysR family transcriptional regulator	1.0839
PA14_06250		GNAT family acetyltransferase	1.0727
PA14_06260		LysR family transcriptional regulator	2.76456
PA14_06270		hydrolase	1.26764
PA14_06280		hypothetical protein	-1.86484
PA14_06290	glcB	malate synthase G	2.76971
PA14_06300		GNAT family acetyltransferase	1.14107
PA14_06310		ACT domain-containing protein	1.83045
PA14_06320		hypothetical protein	-1.94407
PA14_06330		serine/threonine protein kinase	1.26377
PA14_06340		molybdenum transport regulator	-1.10637
PA14_06350		hypothetical protein	-1.18709
PA14_06390		hypothetical protein	1.71687
PA14_06400		LysR family transcriptional regulator	1.70542
PA14_06430		hypothetical protein	-1.10901
PA14_06460		hypothetical protein	1.1026
PA14_06480		hydrolase	-1.06865
PA14_06500	bioB	biotin synthase	1.52883
PA14_06510	bioF	8-amino-7-oxononanoate synthase	1.07849
PA14_06530		biotin biosynthesis protein bioH	1.03529
PA14_06540		biotin synthesis protein BioC	-1.29778
PA14_06570	bioD	dithiobiotin synthetase	-1.76198
PA14_06580		hypothetical protein	-1.74841
PA14_06600		acyl-CoA dehydrogenase	1.38625
PA14_06620		acyl-CoA dehydrogenase	1.46947
PA14_06640		acyl-CoA dehydrogenase	-1.67994
PA14_06650	nirN	c-type cytochrome	-4.78699
PA14_06670	nirJ	heme d1 biosynthesis protein NirJ	-2.58768
PA14_06690	nirG	transcriptional regulator	-1.60363
PA14_06700	nirL	heme d1 biosynthesis protein NirL	-2.1204
PA14_06710		transcriptional regulator	-3.7801
PA14_06720	nirF	heme d1 biosynthesis protein NirF	-2.94449
PA14_06730	nirC	c-type cytochrome	-2.16159
PA14_06740	nirM	cytochrome c-551	-3.24897
PA14_06750	nirS	nitrite reductase	-3.62681
PA14_06770	nirQ	regulatory protein NirQ	-1.22807
PA14_06790		cytochrome c oxidase subunit	-2.56424
PA14_06800		hypothetical protein	-1.58891
PA14_06860		hypothetical protein	-13.3399
PA14_06870	dnr	transcriptional regulator Dnr	-3.77803
PA14_06890		hypothetical protein	-1.47441
PA14_06900		hypothetical protein	1.02417
PA14_06950		LuxR family transcriptional regulator	-1.18749
PA14_06960		hypothetical protein	1.05567
PA14_06970		Cro/CI family transcriptional regulator	-1.08518
PA14_06980		hypothetical protein	1.52051
PA14_06990		hypothetical protein	1.74173
PA14_07000	dsbB	DsbB1	-1.68017
PA14_07010		hypothetical protein	-1.2986
PA14_07020		hypothetical protein	-1.42396
PA14_07030		cytochrome c'	-2.2656
PA14_07040		hypothetical protein	-1.02369
PA14_07050		hypothetical protein	1.64375
PA14_07060		hypothetical protein	-2.32574
PA14_07070		hypothetical protein	1.2263
PA14_07090	metK	S-adenosylmethionine synthetase	1.9788
PA14_07110		ArsR family transcriptional regulator	-1.49483
PA14_07130	tktA	transketolase	1.15621
PA14_07140		hypothetical protein	-1.88691
PA14_07150		hypothetical protein	-1.12768
PA14_07170	epd	D-erythrose 4-phosphate dehydrogenase	-1.79076
PA14_07190	pgk	phosphoglycerate kinase	1.30467
PA14_07200		hypothetical protein	1.50288
PA14_07210		hypothetical protein	-1.47547
PA14_07230	fda	fructose-1,6-bisphosphate aldolase	1.69239
PA14_07240		hypothetical protein	-1.37554
PA14_07260		hypothetical protein	1.1426
PA14_07280		hypothetical protein	-2.26626
PA14_07290		hypothetical protein	-1.95402
PA14_07300		hypothetical protein	-1.8095
PA14_07310		hydrolase	-2.06461
PA14_07330		hypothetical protein	-2.98095
PA14_07340		transcriptional regulator	-1.62418
PA14_07355		hypothetical protein	-1.01437
PA14_07360		hypothetical protein	1.11439
PA14_07370		hypothetical protein	-1.53172
PA14_07380		hypothetical protein	1.11968
PA14_07410		hypothetical protein	1.09117
PA14_07420		hypothetical protein	1.01576
PA14_07430		hypothetical protein	2.7195
PA14_07440		hypothetical protein	-1.62186
PA14_07450		hypothetical protein	-1.70231
PA14_07470		tRNA-Met	-3.54134
PA14_07480		reverse transcriptase	-1.23201
PA14_07500		hypothetical protein	-2.07592
PA14_07520	rpoD	RNA polymerase sigma factor RpoD	-1.01505
PA14_07530	dnaG	DNA primase	-1.04173
PA14_07550		hypothetical protein	-2.99717
PA14_07560	rpsU	30S ribosomal protein S21	-4.687
PA14_07570	gcp	DNA-binding/iron metalloprotein/AP endonuclease	-2.48111
PA14_07580		glycerol-3-phosphate acyltransferase PlsY	1.03745
PA14_07590	folB	dihydroneopterin aldolase	-3.32599
PA14_07600		2-amino-4-hydroxy-6- hydroxymethyldihydropteridine pyrophosphokinase	-2.72353
PA14_07620	cca	multifunctional tRNA nucleotidyl transferase/2'3'-cyclic phosphodiesterase/2'nucleotidase/phosphatase	-1.21835
PA14_07630		hypothetical protein	1.07209
PA14_07650		SpoVR family protein	2.35219
PA14_07660		hypothetical protein	2.34204
PA14_07680		hypothetical protein	3.51123
PA14_07690	glpE	thiosulfate sulfurtransferase	-1.83161
PA14_07700	apaH	diadenosine tetraphosphatase	2.01208
PA14_07710	apaG	ApaG protein	-2.20755
PA14_07730	ksgA	dimethyladenosine transferase	-1.67084
PA14_07740	pdxA	4-hydroxythreonine-4-phosphate dehydrogenase	-1.21641
PA14_07760	surA	peptidyl-prolyl cis-trans isomerase SurA	-1.28636
PA14_07770	ostA	organic solvent tolerance protein OstA	-1.56804
PA14_07780		hypothetical protein	1.33034
PA14_07790		nucleotidyl transferase	-1.04898
PA14_07800		hypothetical protein	-1.06012
PA14_07810		hypothetical protein	1.94546
PA14_07820		histidine kinase	-1.31331
PA14_07840		two-component response regulator	-1.06797
PA14_07860		ABC transporter ATP-binding protein	-1.18049
PA14_07900		ABC transporter permease	-1.20727
PA14_07910	rpe	ribulose-phosphate 3-epimerase	-1.88691
PA14_07930		phosphoglycolate phosphatase	-2.34802
PA14_07940	trpE	anthranilate synthase component I	-1.20654
PA14_07950	prtN	transcriptional regulator PrtN	1.32554
PA14_07960	prtR	transcriptional regulator PrtR	1.07813
PA14_07970		hypothetical protein	2.6329
PA14_07980		hypothetical protein	3.46413
PA14_08000		hypothetical protein	1.87424
PA14_08010		hypothetical protein	3.15914
PA14_08020		bacteriophage protein	4.35982
PA14_08030		phage baseplate assembly protein	3.64972
PA14_08040		phage tail protein	5.5426
PA14_08050		tail fiber protein	3.36093
PA14_08060		tail fiber assembly protein	3.42194
PA14_08070		phage tail sheath protein	5.16599
PA14_08090		phage tail tube protein	5.24055
PA14_08100		hypothetical protein	5.25617
PA14_08120		tail length determinator protein	4.27948
PA14_08130		hypothetical protein	4.2851
PA14_08140		hypothetical protein	4.78193
PA14_08150		phage late control gene D protein	4.32019
PA14_08160		lytic enzyme	4.57855
PA14_08180		hypothetical protein	4.07991
PA14_08200		hypothetical protein	4.17884
PA14_08210		hypothetical protein	4.11812
PA14_08220		hypothetical protein	4.76461
PA14_08230		hypothetical protein	5.24369
PA14_08240		hypothetical protein	4.71812
PA14_08250		hypothetical protein	4.27941
PA14_08260		minor tail protein L	4.04136
PA14_08270		hypothetical protein	3.8837
PA14_08280		bacteriophage protein	3.90718
PA14_08300		phage-related protein, tail component	3.23288
PA14_08310		hypothetical protein	2.08184
PA14_08320		hypothetical protein	1.75692
PA14_08330		hypothetical protein	1.20617
PA14_08340	trpG	anthranilate synthase component II	-1.31639
PA14_08350	trpD	anthranilate phosphoribosyltransferase	-1.04943
PA14_08360	trpC	indole-3-glycerol-phosphate synthase	-1.60503
PA14_08370	vfr	cAMP-regulatory protein	-3.54851
PA14_08380		hypothetical protein	-1.85017
PA14_08390	speD	S-adenosylmethionine decarboxylase	-2.04916
PA14_08400		hypothetical protein	-1.0483
PA14_08420		HIT family protein	-1.13474
PA14_08430		ATPase	1.03431
PA14_08440		short chain alcohol dehydrogenase	1.04333
PA14_08450		hypothetical protein	1.35978
PA14_08460		hypothetical protein	1.7274
PA14_08470		hypothetical protein	-2.10835
PA14_08480	argC	N-acetyl-gamma-glutamyl-phosphate reductase	-1.10721
PA14_08490		hypothetical protein	-1.57134
PA14_08500		hypothetical protein	-1.20141
PA14_08510		iron-sulfur cluster insertion protein ErpA	-1.25938
PA14_08520	anmK	anhydro-N-acetylmuramic acid kinase	-1.33558
PA14_08540		hypothetical protein	-1.14526
PA14_08560	tyrZ	tyrosyl-tRNA synthetase	-1.97718
PA14_08570		16S ribosomal RNA	-1.00629
PA14_08580		tRNA-Ile	3.34617
PA14_08590		tRNA-Ala	1.05109
PA14_08600		23S ribosomal RNA	-1
PA14_08620	birA	biotin--protein ligase	-2.31188
PA14_08630		pantothenate kinase	-1.65511
PA14_08640		hypothetical protein	-1.9868
PA14_08660		tRNA-Gly	1.23692
PA14_08670		tRNA-Thr	3.4425
PA14_08680	tufB	elongation factor Tu	1.20602
PA14_08690		tRNA-Trp	1.00937
PA14_08695	secE	preprotein translocase subunit SecE	-1.89708
PA14_08710	nusG	transcription antitermination protein NusG	-2.17858
PA14_08720	rplK	50S ribosomal protein L11	-2.10905
PA14_08730	rplA	50S ribosomal protein L1	-1.34138
PA14_08740	rplJ	50S ribosomal protein L10	-4.2722
PA14_08750	rplL	50S ribosomal protein L7/L12	-4.98352
PA14_08760	rpoB	DNA-directed RNA polymerase subunit beta	1.51612
PA14_08780	rpoC	DNA-directed RNA polymerase subunit beta'	1.60305
PA14_08790	rpsL	30S ribosomal protein S12	-1.44847
PA14_08810	rpsG	30S ribosomal protein S7	-1.96903
PA14_08820	fusA1	elongation factor G	-2.29129
PA14_08830	tufA	elongation factor Tu	1.1953
PA14_08840	rpsJ	30S ribosomal protein S10	-2.69269
PA14_08850	rplC	50S ribosomal protein L3	-2.3422
PA14_08860	rplD	50S ribosomal protein L4	1.01008
PA14_08870	rplW	50S ribosomal protein L23	-2.72157
PA14_08880	rplB	50S ribosomal protein L2	1.10545
PA14_08890	rpsS	30S ribosomal protein S19	-1.90424
PA14_08900	rplV	50S ribosomal protein L22	-1.27075
PA14_08910	rpsC	30S ribosomal protein S3	-1.92775
PA14_08920	rplP	50S ribosomal protein L16	-1.59444
PA14_08930	rpmC	50S ribosomal protein L29	-2.81168
PA14_08940	rpsQ	30S ribosomal protein S17	-2.95857
PA14_08950	rplN	50S ribosomal protein L14	-1.73137
PA14_08960	rplX	50S ribosomal protein L24	-1.65034
PA14_08970	rplE	50S ribosomal protein L5	-2.16776
PA14_08980	rpsN	30S ribosomal protein S14	-1.40729
PA14_08990	rpsH	30S ribosomal protein S8	-2.73206
PA14_09000	rplF	50S ribosomal protein L6	-1.31905
PA14_09010	rplR	50S ribosomal protein L18	-1.96736
PA14_09020	rpsE	30S ribosomal protein S5	-2.43528
PA14_09030	rpmD	50S ribosomal protein L30	-1.94304
PA14_09040	rplO	50S ribosomal protein L15	-1.8311
PA14_09050	secY	preprotein translocase subunit SecY	-2.99501
PA14_09070	rpmJ	50S ribosomal protein L36	-2.69602
PA14_09080	rpsM	30S ribosomal protein S13	-3.03494
PA14_09090	rpsK	30S ribosomal protein S11	-1.88451
PA14_09100	rpsD	30S ribosomal protein S4	-1.27205
PA14_09115	rpoA	DNA-directed RNA polymerase subunit alpha	-2.50464
PA14_09130	rplQ	50S ribosomal protein L17	-3.64131
PA14_09150	katA	catalase	1.47218
PA14_09160	bfrA	bacterioferritin	-15.0944
PA14_09180	uvrA	excinuclease ABC subunit A	-1.1025
PA14_09195		major facilitator transporter	-1.8895
PA14_09200	ssb	single-stranded DNA-binding protein	-3.52683
PA14_09210	pchA	salicylate biosynthesis isochorismate synthase	6.42345
PA14_09220	pchB	isochorismate-pyruvate lyase	7.77933
PA14_09230	pchC	pyochelin biosynthetic protein PchC	5.42004
PA14_09240	pchD	pyochelin biosynthesis protein PchD	6.66823
PA14_09260	pchR	transcriptional regulator PchR	4.7336
PA14_09270	pchE	dihydroaeruginoic acid synthetase	5.43685
PA14_09280	pchF	pyochelin synthetase	7.55542
PA14_09290	pchG	pyochelin biosynthetic protein PchG	5.46266
PA14_09300	pchH	ABC transporter ATP-binding protein	4.01157
PA14_09320	pchI	ABC transporter ATP-binding protein	4.42054
PA14_09340	fptA	Fe(III)-pyochelin outer membrane receptor	4.82486
PA14_09350	fptB	hypothetical protein	4.84796
PA14_09380	fptX	transporter	7.12548
PA14_09400	phzS	hypothetical protein	2.32737
PA14_09410	phzG1	pyrodoxamine 5'-phosphate oxidase	1.45221
PA14_09420	phzF1	phenazine biosynthesis protein	1.13851
PA14_09440	phzE1	phenazine biosynthesis protein PhzE	1.35758
PA14_09450	phzD1	phenazine biosynthesis protein PhzD	1.61777
PA14_09460	phzC1	phenazine biosynthesis protein PhzC	2.09138
PA14_09470	phzB1	phenazine biosynthesis protein	1.13527
PA14_09480	phzA1	phenazine biosynthesis protein	1.24769
PA14_09490	phzM	phenazine-specific methyltransferase	-1.21712
PA14_09520	mexI	RND efflux transporter	1.34671
PA14_09530	mexH	RND efflux membrane fusion protein	2.4302
PA14_09540	mexG	hypothetical protein	2.13994
PA14_09550		hypothetical protein	2.20778
PA14_09570		LysR family transcriptional regulator	3.00932
PA14_09580		hypothetical protein	2.49232
PA14_09600	ddlA	D-alanine--D-alanine ligase	1.84221
PA14_09610		hypothetical protein	1.61901
PA14_09630		acyl-CoA dehydrogenase	1.68973
PA14_09660		acyl-CoA synthetase	1.81345
PA14_09680		two-component sensor	2.12665
PA14_09690		two-component response regulator	2.15025
PA14_09700		monooxygenase	1.23298
PA14_09710		aldehyde dehydrogenase	-1.0345
PA14_09740		MFS transporter	1.29319
PA14_09750		oxidoreductase	-1.24006
PA14_09760		GntR family transcriptional regulator	-1.40987
PA14_09770		AraC family transcriptional regulator	-1.023
PA14_09780		hypothetical protein	-1.68777
PA14_09790		transcriptional regulator	4.0542
PA14_09810		hypothetical protein	3.51142
PA14_09820		acetolactate synthase	1.3859
PA14_09890	ppiC2	peptidyl-prolyl cis-trans isomerase C2	-2.46409
PA14_09900	prpL	Pvds-regulated endoprotease, lysyl class	1.6226
PA14_09930		exonuclease III	-1.00251
PA14_09940		protease	2.14891
PA14_09950		oxidoreductase	3.6385
PA14_09960		hypothetical protein	1.34709
PA14_09970	fpvB	type I ferripyoverdine receptor, FpvB	1.54752
PA14_10010		transcriptional regulator	2.59444
PA14_10020		hypothetical protein	1.20046
PA14_10040		amidase	1.54999
PA14_10070		zinc-dependent oxidoreductase	1.51329
PA14_10090		LysR family transcriptional regulator	1.12839
PA14_10110		transporter	1.30367
PA14_10120		LysR family transcriptional regulator	-1.65415
PA14_10130		short chain dehydrogenase	1.42503
PA14_10140	fepG	ferric enterobactin transport protein FepG	2.04318
PA14_10160	fepD	ferric enterobactin transport protein FepD	1.25412
PA14_10170	fepB	iron-enterobactin transporter periplasmic binding protein	2.91256
PA14_10180	fepC	ferric enterobactin transport protein FepC	2.21931
PA14_10190		transcriptional regulator	1.01024
PA14_10200		TonB-dependent receptor protein	3.09282
PA14_10210		oxidoreductase	2.85667
PA14_10220		SH3 domain-containing protein	-1.13804
PA14_10260		dehydrogenase E1 component	1.16539
PA14_10280		short-chain dehydrogenase	2.03953
PA14_10290	acoR	transcriptional regulator AcoR	1.07644
PA14_10300		efflux protein	2.37276
PA14_10320		transcriptional regulator	1.09495
PA14_10350		secretion protein	-1.00493
PA14_10360		hypothetical protein	-1.03665
PA14_10380		hypothetical protein	-2.06455
PA14_10420	tyrS	tyrosyl-tRNA synthetase	-1.3606
PA14_10470		MFS transporter	1.31221
PA14_10490		hypothetical protein	2.03535
PA14_10500		cbb3-type cytochrome c oxidase subunit I	-1.27649
PA14_10530		GntR family transcriptional regulator	2.09099
PA14_10540		iron-sulfur cluster-binding protein	2.54964
PA14_10550		sulfite or nitrite reductas	2.44917
PA14_10560		hypothetical protein	4.2332
PA14_10590	hpcG	2-oxo-hepta-3-ene-1,7-dioic acid hydratase	1.75449
PA14_10600		MFS transporter	1.42648
PA14_10610	hpcD	5-carboxymethyl-2-hydroxymuconate isomerase	1.41533
PA14_10620	hpcB	homoprotocatechuate 2,3-dioxygenase	1.51652
PA14_10640		hypothetical protein	1.30967
PA14_10660		transcriptional regulator	4.33966
PA14_10670	aph	aminoglycoside 3'-phosphotransferase type IIB	-1.75055
PA14_10680		hypothetical protein	-1.33778
PA14_10700		bacteriophytochrome	2.31727
PA14_10710		hypothetical protein	2.23777
PA14_10730		hypothetical protein	1.4308
PA14_10740		spermidine acetyltransferase	-1.27924
PA14_10750		sugar efflux transporter	-1.87975
PA14_10770		sensor/response regulator hybrid	1.61616
PA14_10780		hypothetical protein	1.13496
PA14_10800	ampR	transcriptional regulator AmpR	-1.24802
PA14_10820		HDIG domain-containing protein	1.58532
PA14_10830		LysR family transcriptional regulator	1.04219
PA14_10840		dehydrogenase	1.05821
PA14_10850		dehydrogenase	1.64047
PA14_10870		hypothetical protein	1.19028
PA14_10910		major facilitator transporter	-1.41886
PA14_10920		hypothetical protein	1.17936
PA14_10940		AraC family transcriptional regulator	-1.00006
PA14_10950		hypothetical protein	1.09685
PA14_10960		ferredoxin oxidoreductase subunit	2.06949
PA14_10970		flavodoxin reductase	1.08188
PA14_10980		hypothetical protein	-1.41797
PA14_11010		hypothetical protein	-1.22951
PA14_11020		3-ketoacyl-ACP reductase	1.33853
PA14_11050		hypothetical protein	1.00498
PA14_11060	cupB1	fimbrial subunit CupB1	-1.10024
PA14_11080	cupB3	usher CupB3	-1.05895
PA14_11110	cupB6	fimbrial protein cupB6	-1.13113
PA14_11120		response regulator	1.05675
PA14_11130		short chain dehydrogenase	-1.45365
PA14_11140		nonribosomal peptide synthetase	1.72724
PA14_11150		transcriptional regulator	-1.2174
PA14_11170		hypothetical protein	-1.16908
PA14_11190		aldehyde dehydrogenase	-1.10733
PA14_11240		DNA-binding transcriptional activator FeaR	2.3349
PA14_11250		hypothetical protein	-1.08726
PA14_11260		epimerase	-1.31545
PA14_11270	oprG	outer membrane protein OprG precursor	1.09337
PA14_11280		hypothetical protein	1.23762
PA14_11290		permease	2.00391
PA14_11310		ABC transporter ATP-binding protein	1.92426
PA14_11320		hypothetical protein	2.84103
PA14_11330		hypothetical protein	1.04166
PA14_11340		thioredoxin	-1.07164
PA14_11350		hypothetical protein	1.00908
PA14_11370		lipoprotein	1.20237
PA14_11380	nrdR	transcriptional regulator NrdR	-2.34428
PA14_11400	ribD	riboflavin-specific deaminase/reductase	-1.42924
PA14_11410	ribC	riboflavin synthase subunit alpha	-1.5289
PA14_11420	ribB	bifunctional 3,4-dihydroxy-2-butanone 4-phosphate synthase/GTP cyclohydrolase II-like protein	-1.10726
PA14_11430	ribH	6,7-dimethyl-8-ribityllumazine synthase	-2.53597
PA14_11450	nusB	transcription antitermination protein NusB	-1.59685
PA14_11460	thiL	thiamine monophosphate kinase	-2.25921
PA14_11470	pgpA	phosphatidylglycerophosphatase A	-2.29888
PA14_11480		hypothetical protein	-1.81071
PA14_11490		hypothetical protein	-1.31494
PA14_11510	ribA	GTP cyclohydrolase II	-1.84539
PA14_11520		hypothetical protein	-1.44526
PA14_11530		hypothetical protein	-1.58793
PA14_11550	dxs	1-deoxy-D-xylulose-5-phosphate synthase	1.01457
PA14_11560	ispA	geranyltranstransferase	-1.43626
PA14_11570	xseB	exodeoxyribonuclease VII small subunit	-2.30259
PA14_11580		hypothetical protein	2.16296
PA14_11590		hypothetical protein	-1.02618
PA14_11610		ABC transporter permease	1.2055
PA14_11620		ABC transporter	1.08692
PA14_11630		two-component sensor	-1.66426
PA14_11650		hypothetical protein	-1.1123
PA14_11660	aqpZ	aquaporin Z	-1.0266
PA14_11670		hypothetical protein	-2.34849
PA14_11680		two-component regulator	-1.30052
PA14_11690	ppa	inorganic pyrophosphatase	2.12958
PA14_11700		hypothetical protein	-1.88893
PA14_11720		hypothetical protein	-2.70644
PA14_11730		protein kinase	-1.02948
PA14_11740		hypothetical protein	1.4489
PA14_11750		acetyltransferase	1.26712
PA14_11760		ethanolamine ammonia-lyase small subunit	1.35166
PA14_11770	eutB	ethanolamine ammonia-lyase large subunit	1.10824
PA14_11790		amino acid transporter	1.02999
PA14_11830		transcriptional regulator	1.80819
PA14_11845	mpl	UDP-N-acetylmuramate:L-alanyl-gamma-D-glutamyl- meso-diaminopimelate ligase	1.04808
PA14_11860		aromatic acid decarboxylase	-1.29672
PA14_11880		hypothetical protein	-1.39894
PA14_11890		hypothetical protein	1.50453
PA14_11900		hypothetical protein	-1.6691
PA14_11910		hypothetical protein	-1.79115
PA14_11920		hypothetical protein	-1.606
PA14_11930		hypothetical protein	-1.70236
PA14_11940		hypothetical protein	-1.34969
PA14_11960		hypothetical protein	1.06336
PA14_11970		3-methyladenine DNA glycosylase	-2.08554
PA14_11980		hypothetical protein	-1.42088
PA14_11990		hydrolase	3.15563
PA14_12010	proA	gamma-glutamyl phosphate reductase	-1.75795
PA14_12020	nadD	nicotinic acid mononucleotide adenylyltransferase	-1.76947
PA14_12030		hypothetical protein	-2.16376
PA14_12050		rRNA large subunit methyltransferase	-2.18652
PA14_12060	pbpA	penicillin-binding protein 2	-1.89177
PA14_12070	rodA	rod shape-determining protein	-2.74549
PA14_12080	sltB1	soluble lytic transglycosylase B	-1.93332
PA14_12090		RlpA family lipoprotein	-1.73064
PA14_12100	dacC	D-ala-D-ala-carboxypeptidase	1.5459
PA14_12110		hypothetical protein	-1.84103
PA14_12120	lipB	lipoate-protein ligase B	-1.06825
PA14_12130	lis	lipoyl synthase	1.00099
PA14_12140		transcriptional regulator	-1.50684
PA14_12160		murein transglycosylase	1.00345
PA14_12180		hypothetical protein	-1.16593
PA14_12200	holA	DNA polymerase III subunit delta	-1.90576
PA14_12210		hypothetical protein	-1.42215
PA14_12230	leuS	leucyl-tRNA synthetase	1.15364
PA14_12260		hypothetical protein	1.35877
PA14_12270		hypothetical protein	-1.10342
PA14_12280	lnt	apolipoprotein N-acyltransferase	1.09512
PA14_12300		hypothetical protein	-2.29322
PA14_12310		metalloprotease	-1.37088
PA14_12330		hypothetical protein	-1.16254
PA14_12350		(dimethylallyl)adenosine tRNA methylthiotransferase	-1.33253
PA14_12360		hypothetical protein	-2.33913
PA14_12370		hypothetical protein	-1.22303
PA14_12390	hemL	glutamate-1-semialdehyde aminotransferase	-1.50641
PA14_12410	thiD	phosphomethylpyrimidine kinase	1.03087
PA14_12440		AcrR family transcriptional regulator	1.47498
PA14_12450		acyl-CoA dehydrogenase	2.12601
PA14_12470		hypothetical protein	1.48351
PA14_12490		AMP nucleosidase	-1.02147
PA14_12530		hypothetical protein	-1.07909
PA14_12540		pseudouridine synthase	-1.53948
PA14_12550		hypothetical protein	-2.06062
PA14_12560		hypothetical protein	-2.00933
PA14_12570		transcription regulator AsnC	-1.09936
PA14_12610		transporter	-1.3939
PA14_12620		hypothetical protein	1.11654
PA14_12650		hypothetical protein	2.04503
PA14_12670		hypothetical protein	-1.70429
PA14_12680		short chain dehydrogenase	2.32686
PA14_12690		hypothetical protein	1.24626
PA14_12700		hypothetical protein	-1.29397
PA14_12730		hypothetical protein	1.02655
PA14_12750		hypothetical protein	-1.34957
PA14_12760		ATP-dependent RNA helicase	-1.29226
PA14_12770		hypothetical protein	-1.37228
PA14_12780		two-component response regulator	-1.54653
PA14_12820		two-component sensor	-1.00271
PA14_12840		acetyltransferase	2.12194
PA14_12850		acetyltransferase	1.21054
PA14_12860		hypothetical protein	-1.20335
PA14_12870	tesB	acyl-CoA thioesterase	-1.39535
PA14_12890		hypothetical protein	-1.14564
PA14_12900		DNA binding protein	-4.14116
PA14_12910		hypothetical protein	-1.38925
PA14_12940		taurine ABC transporter ATP-binding protein	2.41874
PA14_12960		taurine ABC transporter permease	1.67275
PA14_12970	tauD	taurine dioxygenase	4.12464
PA14_12980		hypothetical protein	1.35988
PA14_12990		choline transporter	-1.3182
PA14_13000		transcriptional regulator	1.32238
PA14_13010		hypothetical protein	1.63337
PA14_13030	cioA	CioA, cyanide insensitive terminal oxidase	1.57667
PA14_13040	cioB	CioB, cyanide insensitive terminal oxidase	1.52907
PA14_13050		hypothetical protein	1.36429
PA14_13060		transcriptional regulator	-1.308
PA14_13070		MFS family transporter	1.03547
PA14_13090		acyl-CoA thiolase	1.39025
PA14_13110		long-chain-fatty-acid--CoA ligase	-1.14065
PA14_13130		hypothetical protein	2.19272
PA14_13140		hypothetical protein	1.01568
PA14_13150		transcriptional regulator	-1.05891
PA14_13190		hypothetical protein	1.70759
PA14_13200		hypothetical protein	-1.47099
PA14_13210		hypothetical protein	1.1235
PA14_13220		protein-tyrosine-phosphatase	-1.10173
PA14_13230	moaC	molybdenum cofactor biosynthesis protein MoaC	1.07941
PA14_13250	moaE	molybdopterin converting factor, large subunit	1.07442
PA14_13260	moaB1	MoaB1	1.61439
PA14_13300		hypothetical protein	-3.54781
PA14_13320		hypothetical protein	-2.59268
PA14_13350		hypothetical protein	1.01934
PA14_13370		hypothetical protein	-1.06292
PA14_13380		hypothetical protein	-1.15875
PA14_13390		hypothetical protein	-2.32629
PA14_13410	prfC	peptide chain release factor 3	-1.37481
PA14_13420		hypothetical protein	-1.05776
PA14_13470		AraC family transcriptional regulator	1.12341
PA14_13500		2-hydroxyacid dehydrogenase	-1.05394
PA14_13510		LysR family transcriptional regulator	1.14395
PA14_13520		outer membrane protein	-1.23827
PA14_13530		outer membrane protein	1.03828
PA14_13560		hypothetical protein	-1.53621
PA14_13580		ABC transporter ATP-binding protein	1.52333
PA14_13590		ABC transporter permease	1.15635
PA14_13600		ABC transporter substrate-binding protein	-1.02173
PA14_13620	nhaP	Na+/H+ antiporter NhaP	1.24568
PA14_13630		hypothetical protein	1.20092
PA14_13650		hypothetical protein	-1.69547
PA14_13660		hypothetical protein	-1.75046
PA14_13670		hypothetical protein	-1.40505
PA14_13680		short chain dehydrogenase	-1.57774
PA14_13690		methyltransferase	1.37942
PA14_13710		hypothetical protein	-1.92194
PA14_13720		hypothetical protein	-1.4438
PA14_13730	narL	transcriptional regulator NarL	1.12592
PA14_13740	narX	two-component sensor NarX	-1.01191
PA14_13750	narK1	nitrite extrusion protein 1	-3.08783
PA14_13770	narK2	nitrite extrusion protein 2	-2.11487
PA14_13780	narG	respiratory nitrate reductase alpha subun	-1.31438
PA14_13800	narH	respiratory nitrate reductase beta subuni	-2.76395
PA14_13810	narJ	respiratory nitrate reductase delta chain	-1.55988
PA14_13850	moaA	molybdenum cofactor biosynthesis protein A	-1.56211
PA14_13860		hypothetical protein	-2.02508
PA14_13890		integrase	-1.67388
PA14_13940		S-type pyocin protein	-1.4473
PA14_13990		amino acid ABC transporter	2.75993
PA14_14000		hypothetical protein	-1.10132
PA14_14010		amino acid oxidase	1.55634
PA14_14020		hypothetical protein	1.63436
PA14_14040	rhl	ATP-dependent RNA helicase RhlB	-1.40969
PA14_14060		AMP-binding protein	-2.36073
PA14_14080		carboxylesterase	1.02692
PA14_14100		amino acid-binding protein	1.03631
PA14_14110	pcs	phosphatidylserine synthase	-1.05917
PA14_14130		hypothetical protein	1.1084
PA14_14140		hypothetical protein	-1.39041
PA14_14150		GIY-YIG nuclease superfamily protein	-2.75464
PA14_14160		acetyltransferase	-1.64895
PA14_14170		hypothetical protein	-1.27015
PA14_14200		hypothetical protein	-1.35495
PA14_14210		hypothetical protein	-1.07108
PA14_14220		nucleoid-associated protein NdpA	-1.27374
PA14_14230		hypothetical protein	1.5895
PA14_14250		hypothetical protein	-1.56322
PA14_14270		isochorismatase family hydrolase	1.08927
PA14_14280		LysR family transcriptional regulator	1.29664
PA14_14290		hypothetical protein	-1.37316
PA14_14310		transcriptional regulator	-1.08909
PA14_14320		hypothetical protein	1.15048
PA14_14330		chaperone	1.19316
PA14_14340		SAM-dependent methyltransferase	-1.86184
PA14_14360		sodium:sulfate symporter	-1.20816
PA14_14370		ABC-transporter ATP-binding component	1.06295
PA14_14380		ABC transporter permease	-1.62452
PA14_14390		ABC-type transport protein, periplasmic c	1.15101
PA14_14420		hypothetical protein	-1.62478
PA14_14430		hypothetical protein	-1.57346
PA14_14440	valS	valyl-tRNA synthetase	1.27164
PA14_14450		hypothetical protein	-1.57089
PA14_14460	holC	DNA polymerase III subunit chi	-1.61628
PA14_14470	pepA	leucyl aminopeptidase	1.28879
PA14_14500		hypothetical protein	-1.67104
PA14_14510		hypothetical protein	-2.15102
PA14_14520		hypothetical protein	-2.482
PA14_14530		hypothetical protein	-1.28651
PA14_14570		tRNA-Leu	1.44531
PA14_14590	queA	S-adenosylmethionine--tRNA ribosyltransferase-isomerase	-1.58107
PA14_14600	tgt	queuine tRNA-ribosyltransferase	-1.88655
PA14_14610	yajC	preprotein translocase subunit YajC	-3.66744
PA14_14630	secD	preprotein translocase subunit SecD	-2.62617
PA14_14650	secF	preprotein translocase subunit SecF	-1.84371
PA14_14660		hypothetical protein	2.21572
PA14_14680		extragenic suppressor protein SuhB	-2.84695
PA14_14690		methyltransferase	-1.54471
PA14_14700	cysE	serine O-acetyltransferase	-1.94311
PA14_14710		Rrf2 family protein	-2.6758
PA14_14730	iscS	cysteine desulfurase	1.44531
PA14_14740		scaffold protein	-1.25476
PA14_14750		iron-binding protein IscA	-1.37891
PA14_14770	hscB	co-chaperone HscB	-1.78754
PA14_14780	hscA	chaperone protein HscA	-2.65107
PA14_14800	fdx2	ferredoxin 2Fe-2S	-4.35865
PA14_14810		hypothetical protein	-3.29077
PA14_14820	ndk	nucleoside diphosphate kinase	-2.18129
PA14_14830		hypothetical protein	-1.49174
PA14_14850	pilF	type 4 fimbrial biogenesis protein PilF	1.60271
PA14_14860		hypothetical protein	-1.60428
PA14_14880	ispG	4-hydroxy-3-methylbut-2-en-1-yl diphosphate synthase	-1.40728
PA14_14890	hisS	histidyl-tRNA synthetase	-1.84249
PA14_14900		hypothetical protein	-2.10548
PA14_14910		hypothetical protein	-1.61282
PA14_14930	engA	GTP-binding protein EngA	-1.65134
PA14_14940		aminotransferase	1.0924
PA14_14960		hypothetical protein	1.20736
PA14_14975		hypothetical protein	1.33224
PA14_14990		oxidoreductase	1.13546
PA14_15000		hypothetical protein	-1.92407
PA14_15020		hypothetical protein	-2.45953
PA14_15030	leuA	2-isopropylmalate synthase	1.05903
PA14_15050		hypothetical protein	-1.99027
PA14_15070	oprC	outer membrane copper receptor OprC	4.35914
PA14_15080		hypothetical protein	2.28077
PA14_15090		hypothetical protein	1.3792
PA14_15100		hypothetical protein	-1.10383
PA14_15110		hypothetical protein	-1.93781
PA14_15120		hypothetical protein	2.07804
PA14_15130		hypothetical protein	1.21116
PA14_15140		hypothetical protein	1.25785
PA14_15150		transcriptional regulator	1.07533
PA14_15160		hypothetical protein	-1.39271
PA14_15180		transporter	-1.45048
PA14_15190		hypothetical protein	-1.38402
PA14_15200		hypothetical protein	-1.22197
PA14_15210		LysR family transcriptional regulator	-2.0579
PA14_15230	xseA	exodeoxyribonuclease VII large subunit	-1.44345
PA14_15250		hypothetical protein	-1.08452
PA14_15270		hypothetical protein	1.4065
PA14_15280		hypothetical protein	1.20626
PA14_15290		transcriptional regulator	-1.01871
PA14_15310	guaB	inosine 5'-monophosphate dehydrogenase	1.07539
PA14_15340	guaA	GMP synthase	-1.74323
PA14_15350		integrase	1.41522
PA14_15360		hypothetical protein	3.52462
PA14_15380	repA	replicative helicase, RepA	1.17177
PA14_15400		replication protein, RepC	-1.10967
PA14_15430		resolvase, essential for transposition	-1.15738
PA14_15435		hypothetical protein	-1.08761
PA14_15445	merE	mercury resistance protein	1.53853
PA14_15450	merD	transcriptional regulator MerD	1.67529
PA14_15460	merA	mercuric reductase	1.55188
PA14_15470	merP	periplasmic mercuric ion binding protein, MerP	1.21299
PA14_15475	merT	mercuric transport protein	1.06281
PA14_15480	merR	transcriptional regulator MerR	-1.50396
PA14_15500		oriT-binding protein, TraK	-1.02506
PA14_15510	traJ	conjugal transfer relaxosome component TraJ	-1.50991
PA14_15520	trbJ	conjugal transfer protein TrbJ	-1.40878
PA14_15540		mating pair formation protein TrbL	1.52591
PA14_15560		hypothetical protein	-2.6923
PA14_15570		hypothetical protein	-1.1829
PA14_15580		Type II restriction enzyme, methylase subunit	-1.45357
PA14_15590		hypothetical protein	-1.2449
PA14_15600		hypothetical protein	-2.71801
PA14_15610		hypothetical protein	-1.916
PA14_15650		hypothetical protein	1.17547
PA14_15660		oxidoreductase	-1.33845
PA14_15670		metallo-oxidoreductase	2.32884
PA14_15680		hypothetical protein	2.1377
PA14_15700		amino acid permease	-1.49264
PA14_15710		hypothetical protein	-1.18522
PA14_15720		transglycosylase	-2.24737
PA14_15740	purL	phosphoribosylformylglycinamidine synthase	1.28303
PA14_15770		hypothetical protein	1.89773
PA14_15780		PTS system N-acetylglucosamine-specific IIBC component	-1.04048
PA14_15790		phosphoenolpyruvate-protein phosphotransferase	1.59806
PA14_15820		N-acetylglucosamine-6-phosphate deacetylase	1.28163
PA14_15830		GntR family transcriptional regulator	1.88492
PA14_15840		hypothetical protein	-1.51541
PA14_15850		hypothetical protein	-1.78897
PA14_15860		hypothetical protein	-1.50188
PA14_15870		hypothetical protein	-1.3092
PA14_15880		hypothetical protein	-1.07851
PA14_15890	purT	phosphoribosylglycinamide formyltransferase 2	-1.42958
PA14_15910		hypothetical protein	-1.75122
PA14_15920		major facilitator transporter	-1.57102
PA14_15930		hemolysin	-2.21122
PA14_15940		hypothetical protein	-2.30902
PA14_15960	ffh	signal recognition particle protein Ffh	-1.14103
PA14_15970	rpsP	30S ribosomal protein S16	-3.02771
PA14_15980	rimM	16S rRNA-processing protein RimM	-2.71284
PA14_15990	trmD	tRNA (guanine-N(1)-)-methyltransferase	-5.09979
PA14_16000	rplS	50S ribosomal protein L19	-3.22487
PA14_16010		hypothetical protein	-3.90259
PA14_16020		hypothetical protein	-1.80463
PA14_16030		sodium/hydrogen antiporter	-1.03151
PA14_16040	xerD	site-specific tyrosine recombinase XerD	-1.22428
PA14_16050	dsbC	thiol:disulfide interchange protein DsbC	-2.07525
PA14_16070	hom	homoserine dehydrogenase	-1.17927
PA14_16090	thrC	threonine synthase	-1.04231
PA14_16110		hypothetical protein	-1.10045
PA14_16130		hypothetical protein	-1.15856
PA14_16150		hypothetical protein	1.56988
PA14_16160		hypothetical protein	1.3194
PA14_16180		hypothetical protein	1.84554
PA14_16190		hypothetical protein	1.09042
PA14_16200		hypothetical protein	1.46328
PA14_16210		hypothetical protein	-3.16322
PA14_16220	recJ	single-stranded-DNA-specific exonuclease RecJ	-2.34196
PA14_16250	lasB	elastase LasB	2.27695
PA14_16260		FMN oxidoreductase	1.65612
PA14_16270		hypothetical protein	-2.59505
PA14_16280		transcriptional regulator	1.4722
PA14_16290		hypothetical protein	3.79426
PA14_16300		hypothetical protein	4.00311
PA14_16310		MFS permease	1.98631
PA14_16320		peptidyl-prolyl cis-trans isomerase, FkbP-type	-1.26753
PA14_16330		hypothetical protein	1.05729
PA14_16340		hypothetical protein	1.4667
PA14_16360		hypothetical protein	1.00844
PA14_16370		hypothetical protein	-2.15942
PA14_16380		LysR family transcriptional regulator	1.02096
PA14_16390		GMC-type oxidoreductase	-1.08034
PA14_16410		MFS transporter	1.50398
PA14_16430	wspA	chemotaxis transducer	1.29215
PA14_16440		hypothetical protein	-1.01161
PA14_16450	wspC	methyltransferase	-1.13222
PA14_16460	wspD	CheW domain-containing protein	-1.35071
PA14_16470		chemotaxis sensor/effector fusion protein	-1.26766
PA14_16480	wspF	chemotaxis-specific methylesterase	-1.73316
PA14_16500	wspR	two-component response regulator	-1.50844
PA14_16510		peptide chain release factor 2	-1.24012
PA14_16530	lysS	lysyl-tRNA synthetase	-1.05415
PA14_16550		TetR family transcriptional regulator	-1.45997
PA14_16560		lipoprotein	-1.36356
PA14_16580		hypothetical protein	1.2271
PA14_16590		hypothetical protein	-1.12885
PA14_16600		alpha/beta hydrolase	-1.39559
PA14_16610		hypothetical protein	-1.71079
PA14_16620		hypothetical protein	-1.70996
PA14_16630		outer membrane protein, OmpA	2.22972
PA14_16640		lipoprotein	1.98553
PA14_16660		metal-transporting P-type ATPase	1.52293
PA14_16670		transcriptional regulator CadR	1.06065
PA14_16680		hypothetical protein	2.40809
PA14_16690	ppc	phosphoenolpyruvate carboxylase	1.73917
PA14_16700	adk	adenylate kinase	-3.65084
PA14_16710		hypothetical protein	-2.71703
PA14_16720		PemA	-1.78167
PA14_16730		hypothetical protein	-2.83526
PA14_16740		hypothetical protein	1.63489
PA14_16770		hypothetical protein	-1.6459
PA14_16780		hypothetical protein	1.07941
PA14_16790		TetR family transcriptional regulator	1.4864
PA14_16800		efflux transmembrane protein	3.56272
PA14_16820		efflux transmembrane protein	1.9244
PA14_16830		hypothetical protein	1.2045
PA14_16840		lipoprotein	1.13995
PA14_16860	plsB	glycerol-3-phosphate acyltransferase	1.12055
PA14_16870		ABC transporter ATP-binding protein	-1.60665
PA14_16880		ABC transporter permease	1.0334
PA14_16890		auxiliary component of ABC transporter	-1.17812
PA14_16910		hypothetical protein	-1.46037
PA14_16920		hypothetical protein	-1.47892
PA14_16930		pyridoxal-phosphate dependent protein	-1.48802
PA14_16950	dapD	tetrahydrodipicolinate succinylase	1.21388
PA14_16960		amino acid transporter LysE	1.0884
PA14_16970		arsenate reductase	-2.26535
PA14_16980		hypothetical protein	-1.52565
PA14_16990		hypothetical protein	1.22049
PA14_17010		Na(+)/H(+) exchanger protein	-1.07712
PA14_17030		succinyldiaminopimelate transaminase	-1.15789
PA14_17040	glnD	PII uridylyl-transferase	1.03612
PA14_17050	map	methionine aminopeptidase	-1.66563
PA14_17060	rpsB	30S ribosomal protein S2	-1.80692
PA14_17070	tsf	elongation factor Ts	-1.01543
PA14_17080	pyrH	uridylate kinase	-1.809
PA14_17100	frr	ribosome recycling factor	-1.72806
PA14_17110	uppS	UDP pyrophosphate synthetase	-1.86703
PA14_17120	cdsA	phosphatidate cytidylyltransferase	-2.23477
PA14_17130	dxr	1-deoxy-D-xylulose 5-phosphate reductoisomerase	-2.88934
PA14_17140		membrane-associated zinc metalloprotease	-1.7685
PA14_17150		outer membrane antigen	-1.80685
PA14_17170		hypothetical protein	-1.39291
PA14_17180	lpxD	UDP-3-O-[3-hydroxymyristoyl] glucosamine N-acyltransferase	-1.74081
PA14_17190	fabZ	(3R)-hydroxymyristoyl-ACP dehydratase	-2.21752
PA14_17210	lpxA	UDP-N-acetylglucosamine acyltransferase	-2.00173
PA14_17220	lpxB	lipid-A-disaccharide synthase	-1.43396
PA14_17230	rnhB	ribonuclease HII	-1.56008
PA14_17250		amino acid permease	-1.71196
PA14_17260	dnaE	DNA polymerase III subunit alpha	-1.27255
PA14_17270	accA	acetyl-CoA carboxylase carboxyltransferase subunit alpha	-2.22503
PA14_17290	pyrG	CTP synthetase	1.14276
PA14_17320	eno	phosphopyruvate hydratase	-1.29597
PA14_17330		hypothetical protein	-1.80418
PA14_17340	ispD	2-C-methyl-D-erythritol 4-phosphate cytidylyltransferase	-2.04349
PA14_17370		inner membrane protein	-1.51224
PA14_17380		LysR family transcriptional regulator	1.17837
PA14_17400	adhC	alcohol dehydrogenase	1.86708
PA14_17410		esterase	1.36492
PA14_17420	ispF	2-C-methyl-D-erythritol 2,4-cyclodiphosphate synthase	-1.22442
PA14_17440	truD	tRNA pseudouridine synthase D	-2.4633
PA14_17450	surE	stationary phase survival protein SurE	-1.11442
PA14_17460	pcm	protein-L-isoaspartate O-methyltransferase	-1.84115
PA14_17470		hypothetical protein	-1.52588
PA14_17480	rpoS	RNA polymerase sigma factor RpoS	1.35082
PA14_17490	fdxA	ferredoxin I	-3.90018
PA14_17500	mutS	DNA mismatch repair protein MutS	-2.08453
PA14_17510		hypothetical protein	1.08648
PA14_17520		hypothetical protein	-1.18019
PA14_17530	recA	recombinase A	1.03884
PA14_17540	recX	recombination regulator RecX	-1.34282
PA14_17550		hypothetical protein	1.40206
PA14_17570		hypothetical protein	1.4548
PA14_17580		hypothetical protein	2.02146
PA14_17590		hypothetical protein	-1.16716
PA14_17600		hypothetical protein	-1.26047
PA14_17650		hypothetical protein	-1.46503
PA14_17660		hypothetical protein	-1.98342
PA14_17670		LuxR family transcriptional regulator	-1.13022
PA14_17675	dgkA	diacylglycerol kinase	-2.22584
PA14_17690		hypothetical protein	1.11942
PA14_17700	rpmE2	50S ribosomal protein L31	10.7519
PA14_17710	rpmJ	50S ribosomal protein L36	8.89919
PA14_17720		LuxR family transcriptional regulator	1.679
PA14_17730		hypothetical protein	2.31877
PA14_17740		amino acid ABC transporter permease	3.55474
PA14_17760		methylated-DNA--protein-cysteine methyltransferase	1.53875
PA14_17790		LysR family transcriptional regulator	-1.75137
PA14_17820		hypothetical protein	1.31899
PA14_17890		porin	-1.0288
PA14_17900	metR	transcriptional regulator MetR	-1.02569
PA14_17910		alpha/beta hydrolase	2.59512
PA14_17930	glpD	glycerol-3-phosphate dehydrogenase	-1.54208
PA14_17940	glpR	glycerol-3-phosphate regulon repressor	-1.64327
PA14_17960	glpK	glycerol kinase	1.26359
PA14_17980	glpF	glycerol uptake facilitator protein	-2.2445
PA14_17990		hypothetical protein	-1.58181
PA14_18010		glycerol kinase	-1.5149
PA14_18020		PhzF family phenazine biosynthesis protein	1.06041
PA14_18050		hypothetical protein	1.52934
PA14_18060		hypothetical protein	1.24482
PA14_18070		periplasmic metal-binding protein	-1.07882
PA14_18080		TetR family transcriptional regulator	1.03612
PA14_18090		major facilitator subfamily transporter protein	-1.05483
PA14_18100		hypothetical protein	1.55445
PA14_18110	mmsR	transcriptional regulator MmsR	1.20835
PA14_18120	mmsA	methylmalonate-semialdehyde dehydrogenase	2.54403
PA14_18140	mmsB	3-hydroxyisobutyrate dehydrogenase	1.45274
PA14_18160		oxidoreductase	1.77991
PA14_18180		hypothetical protein	1.53318
PA14_18200		LysR family transcriptional regulator	1.02816
PA14_18210		TatD family deoxyribonuclease	-1.11332
PA14_18230	fruR	DNA-binding transcriptional regulator FruR	1.01597
PA14_18250		phosphotransferase system enzyme I	2.88676
PA14_18260	fruK	1-phosphofructokinase	-1.07679
PA14_18275	fruA	phosphotransferase system, fructose-specific IIBC component	1.03817
PA14_18310		hypothetical protein	1.06091
PA14_18320		hypothetical protein	-1.19355
PA14_18340		hypothetical protein	2.44474
PA14_18360		glycosyl transferase family protein	-1.23617
PA14_18380	algA	mannose-1-phosphate guanylyltransferase	1.40214
PA14_18410	algF	alginate o-acetyltransferase AlgF	1.84307
PA14_18430	algJ	alginate o-acetyltransferase AlgJ	1.20128
PA14_18500	algG	alginate-c5-mannuronan-epimerase AlgG	-1.05082
PA14_18550	alg44	alginate biosynthesis protein Alg44	-1.33777
PA14_18580	algD	GDP-mannose 6-dehydrogenase AlgD	2.23318
PA14_18590		hypothetical protein	-1.44572
PA14_18600		ABC transporter ATP-binding protein	-1.58429
PA14_18610	argF	ornithine carbamoyltransferase	-2.03263
PA14_18620		hypothetical protein	-1.00882
PA14_18630		serine protease	1.18426
PA14_18650		hypothetical protein	-2.48112
PA14_18660		hypothetical protein	-1.55335
PA14_18670	bfrB	bacterioferritin	-33.5245
PA14_18680	bfd	hypothetical protein	11.5782
PA14_18690		peroxidase	1.3568
PA14_18700	rnt	ribonuclease T	-1.22932
PA14_18710	pyrC	dihydroorotase	-1.06052
PA14_18720		OmpA family membrane protein	2.5648
PA14_18740	argG	argininosuccinate synthase	-2.32938
PA14_18750	gloA1	lactoylglutathione lyase	-2.74488
PA14_18800		hypothetical protein	-1.09116
PA14_18810		hypothetical protein	1.14359
PA14_18830		adenylosuccinate lyase	2.59195
PA14_18860		hypothetical protein	-1.15809
PA14_18870		hypothetical protein	-2.11842
PA14_18880	nth	endonuclease III	-2.11258
PA14_18890		electron transport complex protein RsxE	-2.09174
PA14_18900		hypothetical protein	-2.47955
PA14_18910		hypothetical protein	-1.82337
PA14_18920		electron transport complex protein RnfC	-1.45411
PA14_18930		electron transport complex protein RnfB	-1.1275
PA14_18950		Na(+)-translocating NADH-quinone reductase subunit E	-1.66964
PA14_18960		hypothetical protein	1.5973
PA14_18970	pldA	phospholipase D	-1.25347
PA14_19010		hypothetical protein	1.02688
PA14_19030		hypothetical protein	-1.10006
PA14_19050	metG	methionyl-tRNA synthetase	1.24197
PA14_19065		hypothetical protein	2.38132
PA14_19090	dcd	deoxycytidine triphosphate deaminase	-2.07811
PA14_19100	rhlA	rhamnosyltransferase chain A	2.45653
PA14_19110	rhlB	rhamnosyltransferase chain B	2.33898
PA14_19120	rhlR	transcriptional regulator RhlR	1.43841
PA14_19130	rhlI	autoinducer synthesis protein RhlI	-1.00258
PA14_19140	pheC	cyclohexadienyl dehydratase	1.00628
PA14_19150		hypothetical protein	-1.54408
PA14_19160		hypothetical protein	-1.11788
PA14_19170		hypothetical protein	-1.69972
PA14_19190		malate dehydrogenase	2.59953
PA14_19205		hypothetical protein	-1.17568
PA14_19210		hypothetical protein	-1.28419
PA14_19230		hypothetical protein	1.25591
PA14_19290		ATP-dependent RNA helicase	-1.074
PA14_19310		hypothetical protein	1.43095
PA14_19330		hypothetical protein	-1.34845
PA14_19350		hypothetical protein	1.68342
PA14_19360		GNAT family acetyltransferase	2.36911
PA14_19370		asparagine synthetase	2.63595
PA14_19380		transcriptional regulator	-1.56308
PA14_19390		hypothetical protein	-1.0912
PA14_19400	mnmC	5-methylaminomethyl-2-thiouridine methyltransferase	1.16333
PA14_19410		hypothetical protein	-1.14872
PA14_19450		hypothetical protein	-1.04934
PA14_19470	mqoA	malate:quinone oxidoreductase	2.12098
PA14_19480		hypothetical protein	-1.12408
PA14_19490		antioxidant protein	-1.24812
PA14_19500		hypothetical protein	1.00399
PA14_19510		ABC transporter permease	-1.3777
PA14_19520		ABC transporter ATP-binding protein	1.70066
PA14_19530		NAD(P)H-dependent FMN reductase	1.6978
PA14_19540		hypothetical protein	2.30036
PA14_19560	ssuD	alkanesulfonate monooxygenase	3.62326
PA14_19570		ABC transporter permease	2.80943
PA14_19580	ssuB	aliphatic sulfonates transport ATP-binding subunit	3.57164
PA14_19590		molybdopterin-binding protein	1.41811
PA14_19600		hypothetical protein	-1.48606
PA14_19610		hypothetical protein	-1.16254
PA14_19620	folX	D-erythro-7,8-dihydroneopterin triphosphate 2'-epimerase	-1.24143
PA14_19630	folE1	GTP cyclohydrolase I	-1.72054
PA14_19640		short chain dehydrogenase	-1.79749
PA14_19650		hypothetical protein	1.44869
PA14_19660		flavodoxin	-1.06875
PA14_19670		LysR family transcriptional regulator	-1.21431
PA14_19680		hypothetical protein	-2.36607
PA14_19690		hypothetical protein	-2.0076
PA14_19700		aldolase	-1.20237
PA14_19710		alpha/beta hydrolase	-1.17706
PA14_19720		hypothetical protein	2.40315
PA14_19730		oxidoreductase	1.10519
PA14_19740		enoyl-CoA hydratase	1.08495
PA14_19750		hypothetical protein	1.24343
PA14_19770		hypothetical protein	-1.03769
PA14_19800		AraC family transcriptional regulator	-1.70771
PA14_19810		hypothetical protein	1.22505
PA14_19830		hypothetical protein	-1.08174
PA14_19860		hypothetical protein	-1.15383
PA14_19870	ldh	leucine dehydrogenase	6.28316
PA14_19910		pyruvate dehydrogenase E1 component, beta chain	6.38091
PA14_19920		branched-chain alpha-keto acid dehydrogenase subunit E2	5.39008
PA14_19930		hypothetical protein	1.42167
PA14_19940		hypothetical protein	2.15383
PA14_19950		hypothetical protein	1.25927
PA14_19970		hypothetical protein	1.31457
PA14_19990		RNA polymerase ECF-subfamily sigma-70 factor	3.01201
PA14_20000		transmembrane sensor	1.51437
PA14_20010	hasR	heme uptake outer membrane receptor HasR	2.57658
PA14_20020	hasAp	heme acquisition protein HasAp	1.50944
PA14_20030	hasD	transport protein HasD	2.85946
PA14_20040	hasE	metalloprotease secretion protein	1.82935
PA14_20050		outer membrane protein	1.59223
PA14_20060		hypothetical protein	1.33466
PA14_20080		hypothetical protein	1.11101
PA14_20110		hypothetical protein	-1.33682
PA14_20120		hypothetical protein	-1.08159
PA14_20130		LysR family transcriptional regulator	1.40316
PA14_20140	fpr	ferredoxin--NADP+ reductase	1.8164
PA14_20170	nosY	NosY protein	-1.19615
PA14_20180	nosF	NosF protein	-1.52463
PA14_20230	nosR	regulatory protein NosR	2.24234
PA14_20250		hypothetical protein	2.34973
PA14_20260		hypothetical protein	1.53155
PA14_20270	rhlG	beta-ketoacyl reductase	1.02615
PA14_20280		hypothetical protein	1.63508
PA14_20290		DNA binding-protein	1.34695
PA14_20300	phnC	ABC phosphonate transporter ATP-binding protein	1.53294
PA14_20440	phnN	phosphonate transport ATP-binding protein	-1.63567
PA14_20460		hypothetical protein	1.36351
PA14_20470		hypothetical protein	1.38701
PA14_20480		hypothetical protein	1.47293
PA14_20491		acetyltransferase	1.23978
PA14_20500		tRNA-Arg	1.24371
PA14_20520		hypothetical protein	-1.40064
PA14_20530		hypothetical protein	-1.1674
PA14_20550		hypothetical protein	1.97519
PA14_20560	amiE	acylamide amidohydrolase	-1.77199
PA14_20580	amiC	aliphatic amidase expression-regulating protein	-1.30211
PA14_20590	amiR	aliphatic amidase regulator	1.14483
PA14_20600		hypothetical protein	-1.16081
PA14_20610	lecB	fucose-binding lectin PA-IIL	1.33017
PA14_20620		HlyD family secretion protein	-1.17745
PA14_20650	dsdA	D-serine dehydratase	1.80665
PA14_20670		glutamine synthetase	-1.10854
PA14_20680		MFS transporter	-1.4277
PA14_20690		hypothetical protein	1.10404
PA14_20700		glycosyltransferase	1.33733
PA14_20720	flgN	hypothetical protein	1.98695
PA14_20730	flgM	hypothetical protein	2.12898
PA14_20740	flgA	flagellar basal body P-ring biosynthesis protein FlgA	-4.06182
PA14_20750		chemotaxis protein	3.16539
PA14_20760		chemotaxis protein methyltransferase	1.52243
PA14_20770		hypothetical protein	1.31795
PA14_20780		two-component response regulator	1.47054
PA14_20800		histidine phosphotransfer domain-containing protein	-2.82574
PA14_20810	recQ	ATP-dependent DNA helicase RecQ	-1.30862
PA14_20820		two-component response regulator	1.11669
PA14_20840		hypothetical protein	1.00043
PA14_20850		MarR family transcriptional regulator	-2.20849
PA14_20860		Tfp pilus assembly protein FimV	-1.17984
PA14_20880		hypothetical protein	1.00741
PA14_20890	rfaD	ADP-L-glycero-D-manno-heptose-6-epimerase	-1.52098
PA14_20900		MFS transporter	2.0854
PA14_20920		hypothetical protein	1.50686
PA14_20950	fabH2	3-oxoacyl-ACP synthase	1.61421
PA14_20960		isomerase	1.74446
PA14_20970	cyp23	cytochrome P450	2.43018
PA14_20980		short chain dehydrogenas	2.15927
PA14_21000		hypothetical protein	2.05197
PA14_21010		FAD-dependent monooxygenase	2.47264
PA14_21020		non-ribosomal peptide synthetase	4.21845
PA14_21030		ATP-dependent Clp protease proteolytic subunit	1.42778
PA14_21050		short chain dehydrogenase	1.26969
PA14_21070		MerR family transcriptional regulator	-2.34997
PA14_21080		LysR family transcriptional activator	1.00352
PA14_21090		hypothetical protein	1.76095
PA14_21130		outer membrane lipoprotein	1.74978
PA14_21140		ABC transporter permease	-1.07524
PA14_21160		ABC transporter ATP-binding protein	1.38094
PA14_21175		hypothetical protein	1.35793
PA14_21180		3-hydroxyisobutyrate dehydrogenase	-1.03768
PA14_21210		hypothetical protein	1.45169
PA14_21220		hypothetical protein	1.22286
PA14_21230	hepA	ATP-dependent helicase HepA	-1.6624
PA14_21240		hypothetical protein	1.58699
PA14_21250	alkB	hypothetical protein	1.06198
PA14_21260		hypothetical protein	-8.4205
PA14_21280		hypothetical protein	-1.1469
PA14_21310	phaJ1	hypothetical protein	1.17691
PA14_21320		hypothetical protein	-1.59114
PA14_21340	fadD2	long-chain-fatty-acid--CoA ligase	1.21393
PA14_21370	fadD1	long-chain-fatty-acid--CoA ligase	-1.4566
PA14_21400	hrpA	ATP-dependent helicase	-1.39331
PA14_21440		HIT family protein	-3.20555
PA14_21480		hypothetical protein	-1.37003
PA14_21510		hypothetical protein	1.00862
PA14_21520		hypothetical protein	-1.14788
PA14_21530		ankyrin domain-containing protein	1.48379
PA14_21540		3-oxoacyl-ACP synthase	-1.93442
PA14_21550		RNA polymerase ECF-subfamily sigma-70 factor	-1.70258
PA14_21560		hypothetical protein	-1.8895
PA14_21570		hypothetical protein	-1.05173
PA14_21630		hypothetical protein	-1.44468
PA14_21640		short chain dehydrogenase	1.42234
PA14_21650		hypothetical protein	-1.90792
PA14_21660		hypothetical protein	-2.22926
PA14_21670		hypothetical protein	1.46196
PA14_21690		ATP-dependent DNA helicase	1.44801
PA14_21700		two-component sensor	-1.62159
PA14_21710		hypothetical protein	-1.28874
PA14_21720		AraC family transcriptional regulator	-1.62072
PA14_21730		TonB-dependent receptor	1.69834
PA14_21760	capB	cold acclimation protein B	-7.3918
PA14_21770		DMT family permease	-1.72221
PA14_21780		transporter	1.11229
PA14_21790	rdgC	recombination associated protein	-2.61745
PA14_21800		tRNA-Val	-1.15959
PA14_21810		tRNA-Asp	1.12655
PA14_21820		peptidyl-prolyl cis-trans isomerase, FkbP-type	-1.77808
PA14_21830		hypothetical protein	1.35115
PA14_21840		hypothetical protein	-1.84832
PA14_21850		transcriptional regulator	1.05661
PA14_21860		hypothetical protein	1.18566
PA14_21870		EAL domain/GGDEF domain-containing protein	-1.0731
PA14_21880	tsp	periplasmic tail-specific protease	-1.12848
PA14_21890		oxidoreductase	1.88433
PA14_21920		ABC transporter permease	2.05781
PA14_21940		hypothetical protein	-1.39638
PA14_21970		transcriptional regulator	1.15546
PA14_21980		hypothetical protein	1.0049
PA14_21990		aminopeptidase 2	1.02964
PA14_22000	rluA	pseudouridine synthase	-1.20911
PA14_22010	minE	cell division topological specificity factor MinE	-1.25641
PA14_22020	minD	cell division inhibitor MinD	1.72128
PA14_22040	minC	septum formation inhibitor	-2.18564
PA14_22050	htrB	lipid A biosynthesis lauroyl acyltransferase	-2.64424
PA14_22060		hypothetical protein	1.48051
PA14_22075		pirin-related protein	1.10091
PA14_22080		resolvase	7.54771
PA14_22090		hypothetical protein	-1.62765
PA14_22100		hypothetical protein	-1.65734
PA14_22110		hypothetical protein	-1.59719
PA14_22120		hypothetical protein	-2.17218
PA14_22130		hypothetical protein	-1.7803
PA14_22160		hypothetical protein	-2.05951
PA14_22190		hypothetical protein	-1.13832
PA14_22210		hypothetical protein	-1.85521
PA14_22230		hypothetical protein	-1.89986
PA14_22270		recombinase	-1.29837
PA14_22280		pirin-related protein	-1.05277
PA14_22290	vacJ	hypothetical protein	-1.235
PA14_22320		hypothetical protein	1.29013
PA14_22340		hypothetical protein	-4.16425
PA14_22350	actP	acetate permease	-1.94025
PA14_22370		hypothetical protein	-1.25488
PA14_22380		DNA polymerase III subunit epsilon	-1.00389
PA14_22400		hypothetical protein	1.17708
PA14_22410		hypothetical protein	-1.44948
PA14_22420		hypothetical protein	1.27143
PA14_22440		ABC transporter ATP-binding protein/permease	1.51133
PA14_22450	ppiA	peptidyl-prolyl cis-trans isomerase A	1.37314
PA14_22460		alpha/beta hydrolase	1.57069
PA14_22470		LysR family transcriptional regulator	2.43677
PA14_22480		hypothetical protein	-1.63659
PA14_22490	acpD	ACP phosphodieterase	-1.07181
PA14_22510		hypothetical protein	1.03812
PA14_22530		glutathione S-transferase	2.87036
PA14_22550		LysR family transcriptional regulator	1.3254
PA14_22570	csaA	CsaA protein	-2.0186
PA14_22580		AraC family transcriptional regulator	-1.82283
PA14_22620	cyaB	hypothetical protein	-1.54409
PA14_22630		hypothetical protein	1.06987
PA14_22640		AraC family transcriptional regulator	1.13358
PA14_22660		hypothetical protein	1.05687
PA14_22670		ABC transporter ATP-binding protein	-1.19615
PA14_22680		ABC transporter permease	-1.21193
PA14_22690	trkH	potassium uptake protein TrkH	-1.20566
PA14_22710		hypothetical protein	1.2115
PA14_22720		hypothetical protein	1.54315
PA14_22730		two-component sensor	-1.19048
PA14_22740		hypothetical protein	1.44234
PA14_22760	cpxR	two-component response regulator	-1.08661
PA14_22770		hypothetical protein	1.22009
PA14_22780	yciI	YciI-like protein	-2.08341
PA14_22800	yciB	intracellular septation protein A	-3.26403
PA14_22820		PHP domain-containing protein	-1.00971
PA14_22830		SUA5/yciO/yrdC family:Sua5/YciO/YrdC/YwlC family protein	1.1701
PA14_22840		hypothetical protein	-1.31714
PA14_22860		transcriptional regulator	-1.26597
PA14_22870		hypothetical protein	-1.34479
PA14_22880		Fe-S protein	-1.16466
PA14_22890	gapA	glyceraldehyde-3-phosphate dehydrogenase	1.4162
PA14_22910	edd	phosphogluconate dehydratase	-1.46705
PA14_22930	glk	glucokinase	-1.73521
PA14_22940	gltR	two-component response regulator GltR	-2.43314
PA14_22960		two-component sensor	-2.03301
PA14_22980		sugar ABC transporter substrate-binding protein	-1.19049
PA14_22990		ABC sugar transporter permease	-1.76348
PA14_23010	gltK	ABC transporter ATP-binding protein	1.38071
PA14_23030	oprB	glucose/carbohydrate outer membrane porin OprB precursor	1.69542
PA14_23050		hypothetical protein	-1.64733
PA14_23060	hexR	DNA-binding transcriptional regulator HexR	1.03353
PA14_23070	zwf	glucose-6-phosphate 1-dehydrogenase	-1.89868
PA14_23080	pgl	6-phosphogluconolactonase	-1.40251
PA14_23090		keto-hydroxyglutarate-aldolase/keto-deoxy- phosphogluconate aldolase	1.20292
PA14_23110		hypothetical protein	-1.66301
PA14_23120		hypothetical protein	-1.0505
PA14_23130		sensory box GGDEF domain-containing protein	1.88708
PA14_23160	gltS	sodium/glutamate symporter	1.82944
PA14_23170		formimidoylglutamase	2.26631
PA14_23200		short chain dehydrogenase	-1.46387
PA14_23210		phosphoglycolate phosphatase	1.04268
PA14_23220	ubiG	3-demethylubiquinone-9 3-methyltransferase	1.08108
PA14_23240		N-ethylammeline chlorohydrolase	-1.38111
PA14_23250	mtnA	methylthioribose-1-phosphate isomerase	-1.28555
PA14_23260	gyrA	DNA gyrase subunit A	1.30702
PA14_23270	serC	phosphoserine aminotransferase	-1.83168
PA14_23280	pheA	chorismate mutase	-1.84948
PA14_23290	hisC2	histidinol-phosphate aminotransferase	-1.95907
PA14_23310		bifunctional cyclohexadienyl dehydrogenase/ 3-phosphoshikimate 1-carboxyvinyltransferase	1.12418
PA14_23320	cmk	cytidylate kinase	-1.66862
PA14_23330	rpsA	30S ribosomal protein S1	-1.05078
PA14_23340	ihfB	integration host factor subunit beta	-1.61364
PA14_23350	orfA	hypothetical protein	-2.3281
PA14_23360	wzz	O-antigen chain length regulator	-1.76039
PA14_23370	orfK	UDP-N-acetylglucosamine 2-epimerase	-2.18022
PA14_23380	orfH	UDP-N-acetyl-D-mannosaminuronate dehydrogenase	-1.63241
PA14_23390	orfE	polysaccharide biosynthesis protein	-4.31343
PA14_23400		hypothetical protein	-5.46422
PA14_23420		zinc-binding dehydrogenase	-2.38112
PA14_23430		heparinase	-1.61752
PA14_23460	orfN	group 4 glycosyl transferase	-2.74696
PA14_23470	wbpM	nucleotide sugar epimerase/dehydratase WbpM	-1.14314
PA14_23480		hypothetical protein	-1.0543
PA14_23490		tRNA-Asn	1.71807
PA14_23500	tyrB	aromatic amino acid aminotransferase	-1.02362
PA14_23510	uvrB	excinuclease ABC subunit B	-1.0196
PA14_23520		MFS transporter	-1.4026
PA14_23530		secretion protein	-1.1068
PA14_23540	act	transcriptional regulator	-1.03841
PA14_23560	gltX	glutamyl-tRNA synthetase	1.21584
PA14_23590		transcriptional regulator	1.57541
PA14_23610		hydrolase	1.18973
PA14_23620	kdgA	aldolase	-1.61835
PA14_23630		hypothetical protein	-1.77869
PA14_23640		hypothetical protein	-1.45999
PA14_23650		short chain dehydrogenase	-1.049
PA14_23670		hypothetical protein	1.50514
PA14_23680	ibpA	heat-shock protein IbpA	1.63161
PA14_23690		secreted protein	1.29094
PA14_23700		LysR family transcriptional regulator	1.38509
PA14_23720		translation initiation inhibitor	2.02191
PA14_23750	leuC	isopropylmalate isomerase large subunit	1.23674
PA14_23760	leuD	isopropylmalate isomerase small subunit	1.09754
PA14_23790	leuB	3-isopropylmalate dehydrogenase	1.4514
PA14_23800	asd	aspartate-semialdehyde dehydrogenase	-1.02707
PA14_23810		aspartate-semialdehyde dehydrogenase	-1.09158
PA14_23830	fimV	pilus assembly protein	1.20167
PA14_23840	truA	tRNA pseudouridine synthase A	-1.95224
PA14_23850	trpF	N-(5'-phosphoribosyl)anthranilate isomerase	-1.99104
PA14_23860	accD	acetyl-CoA carboxylase subunit beta	-1.36995
PA14_23880	folC	folylpolyglutamate synthetase	-1.12676
PA14_23890		hypothetical protein	1.13701
PA14_23900	cvpA	hypothetical protein	-1.86645
PA14_23920	purF	amidophosphoribosyltransferase	-1.19158
PA14_23930	metZ	O-succinylhomoserine sulfhydrylase	-1.2043
PA14_23950		oxidoreductase	-2.03292
PA14_23970	xcpQ	general secretion pathway protein D	-1.15783
PA14_23980	xcpP	secretion protein XcpP	-1.16943
PA14_23990	xcpR	general secretion pathway protein E	1.79449
PA14_24010	xcpS	general secretion pathway protein F	-1.3953
PA14_24020	xcpT	general secretion pathway protein G	1.14327
PA14_24040	xcpU	general secretion pathway outer membrane protein H precursor	1.07215
PA14_24050	xcpV	general secretion pathway protein I	1.08364
PA14_24060	xcpW	general secretion pathway protein J	1.02451
PA14_24070	xcpX	general secretion pathway protein K	-1.33032
PA14_24080	xcpY	general secretion pathway protein L	1.06695
PA14_24100	xcpZ	general secretion pathway protein M	1.14021
PA14_24140		AraC family transcriptional regulator	-1.3416
PA14_24150		hypothetical protein	-1.73417
PA14_24170	fadH1	2,4-dienoyl-CoA reductase	-1.55112
PA14_24180		hypothetical protein	1.72919
PA14_24190		1-aminocyclopropane-1-carboxylate deaminase	1.79023
PA14_24210		hypothetical protein	1.52294
PA14_24220	ppnK	inorganic polyphosphate/ATP-NAD kinase	-1.91678
PA14_24230		hypothetical protein	-1.1189
PA14_24240		hypothetical protein	-1.38745
PA14_24245		hypothetical protein	-1.73431
PA14_24260		hypothetical protein	1.02478
PA14_24270	pepN	aminopeptidase	1.03407
PA14_24290	gbt	glycine betaine transmethylase	1.31128
PA14_24300		hypothetical protein	1.99841
PA14_24310		BNR/Asp-box repeat-containing protein	-3.27766
PA14_24330		hypothetical protein	-2.0894
PA14_24340		two-component sensor	-1.69029
PA14_24370		hypothetical protein	-1.05627
PA14_24390		hypothetical protein	1.14491
PA14_24410		hypothetical protein	-1.03378
PA14_24420		hypothetical protein	-1.11446
PA14_24430		hypothetical protein	-1.03999
PA14_24445	gdhB	NAD-dependent glutamate dehydrogenase	2.60624
PA14_24530	pelE	hypothetical protein	1.0308
PA14_24560	pelG	hypothetical protein	1.05505
PA14_24570		hypothetical protein	1.7808
PA14_24580		hypothetical protein	1.51581
PA14_24590		hypothetical protein	1.47545
PA14_24600		carboxypeptidase	1.56822
PA14_24610		hydrolytic enzyme	1.11865
PA14_24620		hypothetical protein	1.15837
PA14_24640	pyrD	dihydroorotate dehydrogenase 2	1.01896
PA14_24650	rmf	ribosome modulation factor	-3.02348
PA14_24690		D-alanyl-D-alanine carboxypeptidase	1.62565
PA14_24700		hypothetical protein	-5.0735
PA14_24710		two-component response regulator	-1.03398
PA14_24720		two-component sensor	1.53459
PA14_24730		deoxyguanosinetriphosphate triphosphohydrolase-like protein	1.08489
PA14_24740		hypothetical protein	1.70506
PA14_24760		hypothetical protein	1.76658
PA14_24770		hypothetical protein	1.00005
PA14_24780		transporter	1.05288
PA14_24790		outer membrane porin	-2.42832
PA14_24810		hypothetical protein	-1.02652
PA14_24820		hypothetical protein	-1.10085
PA14_24830		glutathione S-transferase	-1.61333
PA14_24840		transcriptional regulator	-1.41876
PA14_24850		hypothetical protein	-1.48631
PA14_24870		tRNA-Pro	-1.12061
PA14_24880		lipoprotein	-1.23206
PA14_24890	mobA	molybdopterin-guanine dinucleotide biosynthesis protein MobA	-1.25564
PA14_24900	moaB2	molybdopterin biosynthetic protein B2	-1.45673
PA14_24910	moeA2	molybdenum cofactor biosynthesis protein A2	1.10399
PA14_24920		transcriptional regulator	-1.11817
PA14_24940		hypothetical protein	-1.05984
PA14_24950		FAD-dependent glycerol-3-phosphate dehydrogenase	1.00915
PA14_24970		lipid kinase	1.46927
PA14_24980		hypothetical protein	1.19531
PA14_24990		hypothetical protein	1.73777
PA14_25000		lytic transglycosylase	-1.02681
PA14_25020		ABC transporter ATP-binding protein	1.06293
PA14_25030		hypothetical protein	-1.32409
PA14_25040		hypothetical protein	1.04815
PA14_25050		hypothetical protein	-1.61221
PA14_25060		hypothetical protein	-1.20664
PA14_25080	fadB	multifunctional fatty acid oxidation complex subunit alpha	-1.58245
PA14_25090	fadA	3-ketoacyl-CoA thiolase	-1.40025
PA14_25110	topA	DNA topoisomerase I	-1.20837
PA14_25130		hypothetical protein	-2.0571
PA14_25140		hypothetical protein	-2.84735
PA14_25150		hypothetical protein	-1.08908
PA14_25160	lexA	LexA repressor	1.10864
PA14_25180	psrA	transcriptional regulator PsrA	3.11819
PA14_25195	nagZ	beta-hexosaminidase	1.01641
PA14_25210		5'-methylthioadenosine phosphorylase	1.02166
PA14_25220		hypothetical protein	-1.12517
PA14_25230	mfd	transcription-repair coupling factor	-1.05591
PA14_25250		glyceraldehyde-3-phosphate dehydrogenase	1.33053
PA14_25270	aroP1	aromatic amino acid transport protein AroP1	-1.77219
PA14_25280	nqrA	Na(+)-translocating NADH-quinone reductase subunit A	1.2298
PA14_25305	nqrB	Na(+)-translocating NADH-quinone reductase subunit B	1.17469
PA14_25320	nqrC	Na(+)-translocating NADH-quinone reductase subunit C	-1.05078
PA14_25330	nqrD	Na(+)-translocating NADH-quinone reductase subunit D	1.0088
PA14_25340	nqrE	Na(+)-translocating NADH-quinone reductase subunit E	-1.37262
PA14_25350	nqrF	Na(+)-translocating NADH-quinone reductase subunit F	-1.24053
PA14_25360		thiamine biosynthesis lipoprotein	-1.28385
PA14_25370		hypothetical protein	-1.97954
PA14_25390	sth	soluble pyridine nucleotide transhydrogenase	-1.44651
PA14_25400		phosphodiesterase	1.51467
PA14_25410		hypothetical protein	1.2366
PA14_25430		hypothetical protein	-1.19275
PA14_25440		lipoprotein releasing system, ATP-binding protein	1.27304
PA14_25450		hypothetical protein	-1.61313
PA14_25470		hypothetical protein	-3.02374
PA14_25490		tolQ-type transport protein	-1.29228
PA14_25500		hypothetical protein	-1.91188
PA14_25510	lpxK	tetraacyldisaccharide 4'-kinase	-1.41545
PA14_25520		hypothetical protein	-1.43718
PA14_25530	kdsB	3-deoxy-manno-octulosonate cytidylyltransferase	1.30209
PA14_25540	ptpA	phosphotyrosine protein phosphatase	-1.45622
PA14_25550	murB	UDP-N-acetylenolpyruvoylglucosamine reductase	-1.31956
PA14_25560	rne	ribonuclease E	1.18992
PA14_25580	rluC	ribosomal large subunit pseudouridine synthase C	1.13884
PA14_25590		hydrolase	-1.10404
PA14_25600		peptidase	-1.30522
PA14_25610		Maf-like protein	-1.37776
PA14_25620		hypothetical protein	-4.45178
PA14_25630	rpmF	50S ribosomal protein L32	-4.35252
PA14_25640	plsX	glycerol-3-phosphate acyltransferase PlsX	-2.79378
PA14_25650	fabD	malonyl-CoA-ACP transacylase	-1.5469
PA14_25660	fabG	3-ketoacyl-ACP reductase	-1.55422
PA14_25670	acpP	acyl carrier protein	-8.58584
PA14_25690	fabF1	3-oxoacyl-ACP synthase	-2.93364
PA14_25710	pabC	4-amino-4-deoxychorismate lyase	-2.14021
PA14_25730		hypothetical protein	-1.62455
PA14_25740	tmk	thymidylate kinase	-1.58672
PA14_25760	holB	DNA polymerase III subunit delta'	-2.4239
PA14_25770	pilZ	type 4 fimbrial biogenesis protein PilZ	-2.75784
PA14_25780		TatD family deoxyribonuclease	-1.05324
PA14_25790		hypothetical protein	1.34728
PA14_25800		TetR family transcriptional regulator	-1.5506
PA14_25820		lipoprotein	-1.45961
PA14_25830		hypothetical protein	-1.32926
PA14_25840		electron transfer flavoprotein-ubiquinone oxidoreductase	-1.12905
PA14_25860	etfB	electron transfer flavoprotein subunit beta	1.03279
PA14_25880	etfA	electron transfer flavoprotein subunit alpha	1.60192
PA14_25900		trans-2-enoyl-CoA reductase	-1.16789
PA14_25920	cobM	precorrin-3 methylase	-1.01853
PA14_25930		hypothetical protein	-1.27616
PA14_25960		cobalamin biosynthesis protein cobW	1.20183
PA14_25970	cobN	cobaltochelatase subunit CobN	-1.77912
PA14_25980	aroF	phospho-2-dehydro-3-deoxyheptonate aldolase	1.01615
PA14_25990		magnesium chelatase	-1.42955
PA14_26000		magnesium chelatase	1.8844
PA14_26020		aminopeptidase	-1.02356
PA14_26050		transporter	1.90059
PA14_26060		hypothetical protein	2.23031
PA14_26070		hypothetical protein	1.37973
PA14_26090		hydrolase	2.46573
PA14_26110		MFS transporter	2.90018
PA14_26130	morB	morphinone reductase	3.9887
PA14_26140		transcriptional regulator	3.81429
PA14_26150		transcriptional regulator	1.38404
PA14_26160		hypothetical protein	1.77037
PA14_26165		hypothetical protein	1.1209
PA14_26190		hypothetical protein	1.23808
PA14_26200		hypothetical protein	-1.22882
PA14_26270		transcriptional regulator	-1.7311
PA14_26280		chemotaxis transducer	2.60333
PA14_26300		hypothetical protein	1.29084
PA14_26310		short chain dehydrogenase	1.3732
PA14_26330		AraC family transcriptional regulator	-1.92996
PA14_26340		hypothetical protein	-1.30221
PA14_26350		hypothetical protein	2.28347
PA14_26360		ABC transporter permease	1.6096
PA14_26400		ABC transporter ATP-binding protein	-1.00573
PA14_26420		TonB-dependent receptor	2.5216
PA14_26450		hypothetical protein	1.0547
PA14_26460	cobK	cobalt-precorrin-6x reductase	-1.40667
PA14_26470	cbiD	cobalt-precorrin-6A synthase	1.62159
PA14_26480	cobL	precorrin-6y-dependent methyltransferase CobL	-1.02442
PA14_26485		oxidoreductase	-1.80666
PA14_26510	cobI	precorrin-2 C(20)-methyltransferase	-2.15558
PA14_26530	cobJ	precorrin-3 methylase CobJ	-1.38063
PA14_26540		hypothetical protein	-1.48586
PA14_26550		lipoprotein	-1.4064
PA14_26560		outer membrane protein	-1.31433
PA14_26570		transcriptional regulator	1.25221
PA14_26580		hypothetical protein	1.48701
PA14_26590		GntR family transcriptional regulator	1.06236
PA14_26600		RNA polymerase sigma factor	1.46941
PA14_26610		hypothetical protein	1.188
PA14_26620		hypothetical protein	1.20396
PA14_26640		long-chain-acyl-CoA synthetase	1.2271
PA14_26650		short chain dehydrogenase	1.00207
PA14_26670		biotin carboxylase	1.53807
PA14_26690		enoyl-CoA hydratase/isomerase	1.39284
PA14_26700		acyl-CoA dehydrogenase	1.57973
PA14_26720		biotin-dependent carboxylase	1.82882
PA14_26730		short-chain dehydrogenase	1.05774
PA14_26750		hypothetical protein	1.43373
PA14_26760		transcriptional regulator	1.29313
PA14_26770		hypothetical protein	-1.09545
PA14_26780		hypothetical protein	-1.07178
PA14_26810		two-component sensor	2.32544
PA14_26830		two-component response regulator	-1.05145
PA14_26850		hypothetical protein	-1.39716
PA14_26860		LysR family transcriptional regulator	-1.00794
PA14_26870		hypothetical protein	1.40381
PA14_26880	bvlR	BvlR	-1.40813
PA14_26910		hypothetical protein	-1.45699
PA14_26920		hypothetical protein	2.39823
PA14_26930		transglutaminase	-1.13599
PA14_26940		hypothetical protein	1.3341
PA14_26960		hypothetical protein	-1.01239
PA14_26970		hypothetical protein	1.44819
PA14_26980		hypothetical protein	1.82615
PA14_27000		chemotaxis transducer	-1.08623
PA14_27020	mttC	secretion protein MttC	-1.48835
PA14_27050		Slt family transglycosylase	-1.28388
PA14_27070		hypothetical protein	1.17375
PA14_27130	greB	transcription elongation factor GreB	-2.06784
PA14_27140		hypothetical protein	-1.28021
PA14_27150		ABC transporter ATP-binding protein	-1.84577
PA14_27160	tesA	acyl-CoA thioesterase	-1.06316
PA14_27170		hypothetical protein	-1.96837
PA14_27180		hypothetical protein	1.17312
PA14_27190		tRNA-Ser	6.55017
PA14_27200		hypothetical protein	-1.41294
PA14_27210	efp	elongation factor P	-4.59584
PA14_27220	ohr	organic hydroperoxide resistance protein	1.6732
PA14_27230		MarR family transcriptional regulator	1.05332
PA14_27250		LysR family transcriptional regulator	1.76448
PA14_27270		hypothetical protein	1.07387
PA14_27280		LysR family transcriptional regulator	1.16749
PA14_27290		hypothetical protein	1.02041
PA14_27310		hypothetical protein	-1.00933
PA14_27330		phospho-2-dehydro-3-deoxyheptonate aldolase	-1.39503
PA14_27350		hypothetical protein	-2.27265
PA14_27360		enoyl-CoA hydratase	1.44135
PA14_27370		ATP-dependent RNA helicase	-2.02129
PA14_27390		hypothetical protein	-1.16634
PA14_27420		secretion protein	2.57919
PA14_27430		multidrug efflux MFS transporter	1.49032
PA14_27440		transcriptional regulator	-1.5504
PA14_27450		hypothetical protein	-1.08384
PA14_27460	tpm	thiopurine S-methyltransferase	-1.0594
PA14_27470		zinc carboxypeptidase	-1.05074
PA14_27480	htpX	heat shock protein HtpX	1.01238
PA14_27490		hypothetical protein	-1.36932
PA14_27500		aminotransferase	1.15946
PA14_27510		methionine sulfoxide reductase B	-1.50619
PA14_27520		glutathione peroxidase	2.30511
PA14_27530		MarR family transcriptional regulator	2.13035
PA14_27550		sensor/response regulator hybrid	-1.11239
PA14_27560		hypothetical protein	-1.27883
PA14_27570		GAF domain-containing protein	-1.15198
PA14_27580		glutathione S-transferase	-1.03602
PA14_27590		hypothetical protein	-2.24236
PA14_27610		tRNA-Gly	-1.77359
PA14_27630		protein associated with synthesis and assembly of refractile inclusion bodies	-1.08108
PA14_27640		protein associated with synthesis and assembly of refractile inclusion bodies	1.08554
PA14_27650		hypothetical protein	-1.00882
PA14_27660		hypothetical protein	1.0384
PA14_27680		hypothetical protein	1.03048
PA14_27710		hypothetical protein	-1.77224
PA14_27720		hypothetical protein	2.11192
PA14_27730	fadE	acyl-CoA dehydrogenase	2.61718
PA14_27740		hypothetical protein	1.03011
PA14_27755		glutathione S-transferase	-1.06569
PA14_27770		ABC transporter ATP-binding protein	-1.06173
PA14_27780		ABC transporter permease	-1.21045
PA14_27810		two-component response regulator	1.27722
PA14_27850	queF	7-cyano-7-deazaguanine reductase	-2.85092
PA14_27870		hypothetical protein	-2.54494
PA14_27880		hypothetical protein	-1.14156
PA14_27900		transcriptional regulator	-1.96209
PA14_27910		hypothetical protein	-1.96291
PA14_27920		hypothetical protein	-2.01643
PA14_27930		hypothetical protein	-1.16177
PA14_27940		two-component response regulator	-1.17418
PA14_27950		hypothetical protein	-1.82949
PA14_27960	tal	transaldolase B	1.27725
PA14_27980		tRNA-dihydrouridine synthase A	-1.51171
PA14_27990		sialidase	-1.44968
PA14_28000		hypothetical protein	-1.24672
PA14_28010		hypothetical protein	-1.14296
PA14_28020		hypothetical protein	-1.38944
PA14_28050		chemotaxis transducer	5.48272
PA14_28070		hypothetical protein	2.68455
PA14_28080		transcriptional regulator	-1.8593
PA14_28090		hypothetical protein	1.53236
PA14_28110		hypothetical protein	2.42441
PA14_28120		hypothetical protein	1.57366
PA14_28140		hypothetical protein	1.24003
PA14_28150		hypothetical protein	1.38392
PA14_28170		formate/nitrate transporter	1.34545
PA14_28180		hypothetical protein	1.19747
PA14_28190		tRNA-Val	-1.14175
PA14_28200		hypothetical protein	-2.49962
PA14_28210		hypothetical protein	-1.29983
PA14_28230		hypothetical protein	-1.51178
PA14_28240		hypothetical protein	-1.66389
PA14_28260		hypothetical protein	-1.29974
PA14_28280		PhzF family phenazine biosynthesis protein	-1.28659
PA14_28290		hypothetical protein	-1.91471
PA14_28320		TetR family transcriptional regulator	-1.0362
PA14_28340		hypothetical protein	-1.35688
PA14_28350		hypothetical protein	-2.05606
PA14_28360		hypothetical protein	-2.56748
PA14_28370		hypothetical protein	-1.3573
PA14_28390		hypothetical protein	1.58113
PA14_28400		outer membrane OprD family porin	1.72558
PA14_28410		hypothetical protein	1.87782
PA14_28420		LysR family transcriptional regulator	-1.05788
PA14_28430		hypothetical protein	-1.47479
PA14_28440		hypothetical protein	-3.49299
PA14_28450	eco	ecotin	1.30587
PA14_28460		hypothetical protein	3.46022
PA14_28470		hypothetical protein	1.25435
PA14_28490		hypothetical protein	1.30973
PA14_28500		hypothetical protein	1.37278
PA14_28510		hypothetical protein	-1.17059
PA14_28530		hypothetical protein	1.09317
PA14_28540		hypothetical protein	1.91826
PA14_28560		hypothetical protein	1.01285
PA14_28580		hypothetical protein	-1.19291
PA14_28590		methionine aminopeptidase	1.04812
PA14_28600		hypothetical protein	-1.33655
PA14_28610		hypothetical protein	2.5339
PA14_28620		hypothetical protein	1.10801
PA14_28630		hydrolase	-1.61764
PA14_28650	thrS	threonyl-tRNA synthetase	-1.34612
PA14_28660	infC	translation initiation factor IF-3	-2.80932
PA14_28670	rpmI	50S ribosomal protein L35	-4.54353
PA14_28680	rplT	50S ribosomal protein L20	-1.96343
PA14_28690	pheS	phenylalanyl-tRNA synthetase subunit alpha	1.17285
PA14_28710	pheT	phenylalanyl-tRNA synthetase subunit beta	-1.99906
PA14_28720	ihfA	integration host factor subunit alpha	-1.46559
PA14_28730		transcriptional regulator	-1.38808
PA14_28740		tRNA-Pro	-2.13906
PA14_28750		hypothetical protein	-2.22478
PA14_28770		hypothetical protein	-1.12706
PA14_28800		hypothetical protein	-1.38474
PA14_28810		DNA helicase	-1.5791
PA14_28820		hypothetical protein	-1.07502
PA14_28830		hypothetical protein	1.00086
PA14_28840		helicase	-1.72025
PA14_28870		hypothetical protein	-2.14436
PA14_28895		hypothetical protein	1.07893
PA14_28940		hypothetical protein	-1.21957
PA14_28960		hypothetical protein	1.54611
PA14_28970		hypothetical protein	3.31812
PA14_28990		hypothetical protein	-1.74066
PA14_29000		hypothetical protein	2.01073
PA14_29010		MerR family transcriptional regulator	1.05995
PA14_29020	cpo	chloroperoxidase	-1.08203
PA14_29030		FMN oxidoreductase	1.29859
PA14_29040		ferredoxin	-2.63076
PA14_29050		molybdopterin oxidoreductase	1.14819
PA14_29060		transcriptional regulator	1.16725
PA14_29090		periplasmic spermidine/putrescine-binding protein	-1.37871
PA14_29100		hypothetical protein	1.05011
PA14_29110	cysK	cysteine synthase A	1.35931
PA14_29120		hypothetical protein	-1.1166
PA14_29130		ATPase	1.39768
PA14_29150		hypothetical protein	1.3392
PA14_29180		AraC family transcriptional regulator	-1.04541
PA14_29190		hypothetical protein	-1.19389
PA14_29200		hypothetical protein	-1.12889
PA14_29220		porin	1.03198
PA14_29230		hypothetical protein	1.53981
PA14_29240		hydrolase	-1.14465
PA14_29250		hypothetical protein	1.15324
PA14_29270		outer membrane lipoprotein	-1.44148
PA14_29280		thioredoxin	-1.08584
PA14_29290		hypothetical protein	-1.85417
PA14_29300		transcriptional regulator	-1.95603
PA14_29320		NADH dehydrogenase, FAD-containing subunit	1.15471
PA14_29330		hypothetical protein	1.45028
[truncated: 2,924 more rows]
